# Supplementary material for: Temperature-dependent kinetics of the atmospheric reaction between CH2OO and acetone
Source: Royal Society of Chemistry journal article supplement (doi:10.1039/d2cp01118b), 2022-01-01
Supplement: d2cp01118b1.pdf [file d2cp01118b1.pdf]

SUPPLEMENTARY MATERIAL

MAY 14, 2022

**Temperature-dependent kinetics for the reaction between CH<sub>2</sub>OO and acetone  
in the atmosphere**

Peng-Biao Wang,<sup>a</sup> Donald G. Truhlar,<sup>b</sup> Yu Xia<sup>c</sup>, Bo Long<sup>\*a,c</sup>

<sup>a</sup> Department of Physics, Guizhou University, Guiyang, 550025, China

<sup>b</sup> Department of Chemistry, Chemical Theory Center, and Supercomputing Institute,  
University of Minnesota, Minneapolis, Minnesota 55455-0431, USA

<sup>c</sup> College of Materials Science and Engineering, Guizhou Minzu university, Guiyang  
550025, China

TABLE OF CONTENTS

METHODS

Wave function methods for electronic structure S-2

Explanation of dual-level CVT/SCT calculations S-3

RESULTS

Vibrational scale factors S-4

Calculated the pressure-dependent rate constant S-5

The tunneling transmission coefficients  $k_{TSA}$ , recrossing transmission

coefficients  $\Gamma_{TSA}$ , and rate constants  $k_{R-TSA}^{HL}$  S-12

The tunneling transmission coefficients  $k_{TSB}$ , recrossing transmission

coefficients  $\Gamma_{TSB}$ , and rate constants  $k_{R-TSB}^{HL}$  S-13

Activation energies S-14

The value of  $\nu$  when CH<sub>2</sub>OO is  $5 \times 10^4$  molecule cm<sup>-3</sup> S-15

The value of  $\nu$  when CH<sub>2</sub>OO is  $5 \times 10^5$  molecule cm<sup>-3</sup> S-16

Optimized geometries S-17

Absolute energies in hartrees S-32

Calculated enthalpy profiles S-35

---

\*Corresponding author, E-mail: [wwwltcommon@sina.com](mailto:wwwltcommon@sina.com) (Bo Long)

**General notation for electronic structure methods**

|         |                                                                                                                                                |
|---------|------------------------------------------------------------------------------------------------------------------------------------------------|
| L/B     | This indicates that the electronic structure method L with basis set B is employed to do geometrical optimizations and frequency calculations. |
| DF-     | When L is preceded by DF-, it means that density fitting of the two-electron integrals was employed.                                           |
| CM//L/B | This indicates that single energy calculations are done by composite method (CM) based on the L/B optimized geometries.                        |

**Notation used for single-level electronic structure methods**

|              |                                                                                               |
|--------------|-----------------------------------------------------------------------------------------------|
| CCSD(T)-F12b | same as CSD(T)-F12a except uses the F12b scheme instead of F12a for the explicit correlation. |
|--------------|-----------------------------------------------------------------------------------------------|

**Notation used for composite methods at the CCSD(T) level**

|     |                                                                      |
|-----|----------------------------------------------------------------------|
| W2X | an efficient method of extrapolation to the CCSD(T)/CBS(full) level. |
|-----|----------------------------------------------------------------------|

**Notation used for composite methods that go beyond CCSD(T)**

|       |                                                                                                                                                                                                          |
|-------|----------------------------------------------------------------------------------------------------------------------------------------------------------------------------------------------------------|
| W3X-L | a combination of nonrelativistic CCSD(T)/CBS(FC), scalar relativistic effects, and post-CCSD(T) and core–valence correlation contributions with the goal of approximating the CCSDT(Q)/CBS(full) energy. |
|-------|----------------------------------------------------------------------------------------------------------------------------------------------------------------------------------------------------------|

**Nomenclature used for transition states**

|                               |                                                                                                                                        |
|-------------------------------|----------------------------------------------------------------------------------------------------------------------------------------|
| transition structure          | a first-order saddle point connecting reactants to products (optimized by electronic structure calculations)                           |
| conventional transition state | a dividing surface (between reactants and products) passing through the saddle point and normal to the imaginary-frequency normal mode |
| variational transition state  | a dividing surface optimized to minimize the ensemble averaged flux from reactants to products                                         |

**Geometries used in composite methods**

| <i>Method</i> | <i>Geometries</i>           |
|---------------|-----------------------------|
| W2X           | DF-CCSD(T)-F12b/jun-cc-pVDZ |
| W3X-L         | DF-CCSD(T)-F12b/jun-cc-pVDZ |

### Dual-level method for rate constant calculations at tight transition states

The dual-level method for the rate constants is as follows:

L denotes level-L, which defines an implicit potential energy surface by direct dynamics;

HL denotes higher level.

The rate constant is calculated by combining HL rate constants calculated with conventional transition state theory (TST) and L direct dynamics rate constants calculated with canonical variational transition state theory with small-curvature tunneling (CVT/SCT):

$$k = \frac{k_{TST}^{HL}}{k_{TST}^L} k_{CVT/SCT}^L = k_{TST}^{HL} \frac{k_{SCT}^L k_{CVT}^L}{k_{TST}^L}$$

where

$k_{TST}^{HL}$  is the TST rate constant calculated with HL;

$k_{TST}^L$  is the TST rate constant calculated with L;

$k_{CVT/SCT}^L$  is the CVT/SCT rate constant calculated with L;

$k_{SCT}^L$  is the SCT tunneling transmission coefficient calculated with L;

$k_{CVT/SCT}^L$  is the CVT rate constant calculated with L.

The levels used in the present work are given as follows:

High level (HL): W3X-L//DF-CCSD(T)-F12b/jun-cc-pVDZ

Lower level (L): M11-L/MG3S

**Table S1.** Scale factors for calculating vibrational frequencies different theoretical methods.

| Methods                     | Scale Factor |
|-----------------------------|--------------|
| DF-CCSD(T)-F12b/jun-cc-pVDZ | 0.981        |
| M11-L/MG3S                  | 0.985        |
| M06CR/MG3S                  | 0.980        |
| MN15-L/MG3S                 | 0.977        |
| M06-2X/MG3S                 | 0.970        |
| B3LYP/MG3S                  | 0.983        |

**Table S2.** Rate constants ( $\text{cm}^3 \text{ molecule}^{-1} \text{ s}^{-1}$ ) for the  $\text{CH}_2\text{OO} + \text{CH}_3\text{C}(\text{O})\text{CH}_3$  reaction at the different temperatures and pressures<sup>a</sup>

| <i>P</i> (bar) | T = 190 K | T = 200 K | T = 210 K | T = 220 K |
|----------------|-----------|-----------|-----------|-----------|
| 0.00533        | 1.33E-11  | 7.36E-12  | 4.33E-12  | 2.69E-12  |
| 0.00666        | 1.33E-11  | 7.36E-12  | 4.33E-12  | 2.69E-12  |
| 0.00679        | 1.33E-11  | 7.36E-12  | 4.33E-12  | 2.69E-12  |
| 0.0132         | 1.33E-11  | 7.36E-12  | 4.33E-12  | 2.69E-12  |
| 0.0133         | 1.33E-11  | 7.36E-12  | 4.33E-12  | 2.69E-12  |
| 0.02           | 1.33E-11  | 7.36E-12  | 4.33E-12  | 2.69E-12  |
| 0.0268         | 1.33E-11  | 7.36E-12  | 4.33E-12  | 2.69E-12  |
| 0.0316         | 1.33E-11  | 7.36E-12  | 4.33E-12  | 2.69E-12  |
| 0.0333         | 1.33E-11  | 7.36E-12  | 4.33E-12  | 2.69E-12  |
| 0.04           | 1.33E-11  | 7.36E-12  | 4.33E-12  | 2.69E-12  |
| 0.0401         | 1.33E-11  | 7.36E-12  | 4.33E-12  | 2.69E-12  |
| 0.0533         | 1.33E-11  | 7.36E-12  | 4.33E-12  | 2.69E-12  |
| 0.0666         | 1.33E-11  | 7.36E-12  | 4.33E-12  | 2.69E-12  |
| 0.08           | 1.33E-11  | 7.36E-12  | 4.33E-12  | 2.69E-12  |
| 0.1            | 1.33E-11  | 7.36E-12  | 4.33E-12  | 2.69E-12  |
| 0.107          | 1.33E-11  | 7.36E-12  | 4.33E-12  | 2.69E-12  |
| 0.133          | 1.33E-11  | 7.36E-12  | 4.33E-12  | 2.69E-12  |
| 0.134          | 1.33E-11  | 7.36E-12  | 4.33E-12  | 2.69E-12  |
| 0.178          | 1.33E-11  | 7.36E-12  | 4.33E-12  | 2.69E-12  |
| 0.316          | 1.33E-11  | 7.36E-12  | 4.33E-12  | 2.69E-12  |
| 0.562          | 1.33E-11  | 7.36E-12  | 4.33E-12  | 2.69E-12  |
| 1              | 1.33E-11  | 7.36E-12  | 4.33E-12  | 2.69E-12  |
| 1.01           | 1.33E-11  | 7.36E-12  | 4.33E-12  | 2.69E-12  |
| 1.78           | 1.33E-11  | 7.36E-12  | 4.33E-12  | 2.69E-12  |
| 2              | 1.33E-11  | 7.36E-12  | 4.33E-12  | 2.69E-12  |
| 3.16           | 1.33E-11  | 7.36E-12  | 4.33E-12  | 2.69E-12  |
| 5              | 1.33E-11  | 7.36E-12  | 4.33E-12  | 2.69E-12  |
| 5.62           | 1.33E-11  | 7.36E-12  | 4.33E-12  | 2.69E-12  |
| 10             | 1.33E-11  | 7.36E-12  | 4.33E-12  | 2.69E-12  |
| 31.6           | 1.33E-11  | 7.36E-12  | 4.33E-12  | 2.69E-12  |
| 50             | 1.33E-11  | 7.36E-12  | 4.33E-12  | 2.69E-12  |
| 100            | 1.33E-11  | 7.36E-12  | 4.33E-12  | 2.69E-12  |
| 1000           | 1.33E-11  | 7.36E-12  | 4.33E-12  | 2.69E-12  |
| <i>P</i> (bar) | T = 230 K | T = 240 K | T = 250 K | T = 252 K |
| 0.00533        | 1.75E-12  | 1.18E-12  | 8.28E-13  | 7.75E-13  |
| 0.00666        | 1.75E-12  | 1.18E-12  | 8.28E-13  | 7.75E-13  |
| 0.00679        | 1.75E-12  | 1.18E-12  | 8.28E-13  | 7.75E-13  |
| 0.0132         | 1.75E-12  | 1.18E-12  | 8.28E-13  | 7.75E-13  |
| 0.0133         | 1.75E-12  | 1.18E-12  | 8.28E-13  | 7.75E-13  |
| 0.02           | 1.75E-12  | 1.18E-12  | 8.28E-13  | 7.75E-13  |

|                |           |           |           |           |
|----------------|-----------|-----------|-----------|-----------|
| 0.0268         | 1.75E-12  | 1.18E-12  | 8.28E-13  | 7.75E-13  |
| 0.0316         | 1.75E-12  | 1.18E-12  | 8.28E-13  | 7.75E-13  |
| 0.0333         | 1.75E-12  | 1.18E-12  | 8.28E-13  | 7.75E-13  |
| 0.04           | 1.75E-12  | 1.18E-12  | 8.28E-13  | 7.75E-13  |
| 0.0401         | 1.75E-12  | 1.18E-12  | 8.28E-13  | 7.75E-13  |
| 0.0533         | 1.75E-12  | 1.18E-12  | 8.28E-13  | 7.75E-13  |
| 0.0666         | 1.75E-12  | 1.18E-12  | 8.28E-13  | 7.75E-13  |
| 0.08           | 1.75E-12  | 1.18E-12  | 8.28E-13  | 7.75E-13  |
| 0.1            | 1.75E-12  | 1.18E-12  | 8.28E-13  | 7.75E-13  |
| 0.107          | 1.75E-12  | 1.18E-12  | 8.28E-13  | 7.75E-13  |
| 0.133          | 1.75E-12  | 1.18E-12  | 8.28E-13  | 7.75E-13  |
| 0.134          | 1.75E-12  | 1.18E-12  | 8.28E-13  | 7.75E-13  |
| 0.178          | 1.75E-12  | 1.18E-12  | 8.28E-13  | 7.75E-13  |
| 0.316          | 1.75E-12  | 1.18E-12  | 8.28E-13  | 7.75E-13  |
| 0.562          | 1.75E-12  | 1.18E-12  | 8.28E-13  | 7.75E-13  |
| 1              | 1.75E-12  | 1.18E-12  | 8.28E-13  | 7.75E-13  |
| 1.01           | 1.75E-12  | 1.18E-12  | 8.28E-13  | 7.75E-13  |
| 1.78           | 1.75E-12  | 1.18E-12  | 8.28E-13  | 7.75E-13  |
| 2              | 1.75E-12  | 1.18E-12  | 8.28E-13  | 7.75E-13  |
| 3.16           | 1.75E-12  | 1.18E-12  | 8.28E-13  | 7.75E-13  |
| 5              | 1.75E-12  | 1.18E-12  | 8.28E-13  | 7.75E-13  |
| 5.62           | 1.75E-12  | 1.18E-12  | 8.28E-13  | 7.75E-13  |
| 10             | 1.75E-12  | 1.18E-12  | 8.28E-13  | 7.75E-13  |
| 31.6           | 1.75E-12  | 1.18E-12  | 8.28E-13  | 7.75E-13  |
| 50             | 1.75E-12  | 1.18E-12  | 8.28E-13  | 7.75E-13  |
| 100            | 1.75E-12  | 1.18E-12  | 8.28E-13  | 7.75E-13  |
| 1000           | 1.75E-12  | 1.18E-12  | 8.28E-13  | 7.75E-13  |
| <i>P</i> (bar) | T = 254 K | T = 256 K | T = 258 K | T = 260 K |
| 0.00533        | 7.25E-13  | 6.79E-13  | 6.37E-13  | 5.99E-13  |
| 0.00666        | 7.25E-13  | 6.79E-13  | 6.37E-13  | 5.99E-13  |
| 0.00679        | 7.25E-13  | 6.79E-13  | 6.37E-13  | 5.99E-13  |
| 0.0132         | 7.25E-13  | 6.79E-13  | 6.37E-13  | 5.99E-13  |
| 0.0133         | 7.25E-13  | 6.79E-13  | 6.37E-13  | 5.99E-13  |
| 0.02           | 7.25E-13  | 6.79E-13  | 6.37E-13  | 5.99E-13  |
| 0.0268         | 7.25E-13  | 6.79E-13  | 6.37E-13  | 5.99E-13  |
| 0.0316         | 7.25E-13  | 6.79E-13  | 6.37E-13  | 5.99E-13  |
| 0.0333         | 7.25E-13  | 6.79E-13  | 6.37E-13  | 5.99E-13  |
| 0.04           | 7.25E-13  | 6.79E-13  | 6.37E-13  | 5.99E-13  |
| 0.0401         | 7.25E-13  | 6.79E-13  | 6.37E-13  | 5.99E-13  |
| 0.0533         | 7.25E-13  | 6.79E-13  | 6.37E-13  | 5.99E-13  |
| 0.0666         | 7.25E-13  | 6.79E-13  | 6.37E-13  | 5.99E-13  |
| 0.08           | 7.25E-13  | 6.79E-13  | 6.37E-13  | 5.99E-13  |
| 0.1            | 7.25E-13  | 6.79E-13  | 6.37E-13  | 5.99E-13  |

|                |           |           |           |           |
|----------------|-----------|-----------|-----------|-----------|
| 0.107          | 7.25E-13  | 6.79E-13  | 6.37E-13  | 5.99E-13  |
| 0.133          | 7.25E-13  | 6.79E-13  | 6.37E-13  | 5.99E-13  |
| 0.134          | 7.25E-13  | 6.79E-13  | 6.37E-13  | 5.99E-13  |
| 0.178          | 7.25E-13  | 6.79E-13  | 6.37E-13  | 5.99E-13  |
| 0.316          | 7.25E-13  | 6.79E-13  | 6.37E-13  | 5.99E-13  |
| 0.562          | 7.25E-13  | 6.79E-13  | 6.37E-13  | 5.99E-13  |
| 1              | 7.25E-13  | 6.79E-13  | 6.37E-13  | 5.99E-13  |
| 1.01           | 7.25E-13  | 6.79E-13  | 6.37E-13  | 5.99E-13  |
| 1.78           | 7.25E-13  | 6.79E-13  | 6.37E-13  | 5.99E-13  |
| 2              | 7.25E-13  | 6.79E-13  | 6.37E-13  | 5.99E-13  |
| 3.16           | 7.25E-13  | 6.79E-13  | 6.37E-13  | 5.99E-13  |
| 5              | 7.25E-13  | 6.79E-13  | 6.37E-13  | 5.99E-13  |
| 5.62           | 7.25E-13  | 6.79E-13  | 6.37E-13  | 5.99E-13  |
| 10             | 7.25E-13  | 6.79E-13  | 6.37E-13  | 5.99E-13  |
| 31.6           | 7.25E-13  | 6.79E-13  | 6.37E-13  | 5.99E-13  |
| 50             | 7.25E-13  | 6.79E-13  | 6.37E-13  | 5.99E-13  |
| 100            | 7.25E-13  | 6.79E-13  | 6.37E-13  | 5.99E-13  |
| 1000           | 7.25E-13  | 6.79E-13  | 6.37E-13  | 5.99E-13  |
| <i>P</i> (bar) | T = 263 K | T = 270 K | T = 273 K | T = 280 K |
| 0.00533        | 5.46E-13  | 4.45E-13  | 4.09E-13  | 3.38E-13  |
| 0.00666        | 5.46E-13  | 4.45E-13  | 4.09E-13  | 3.38E-13  |
| 0.00679        | 5.46E-13  | 4.45E-13  | 4.09E-13  | 3.38E-13  |
| 0.0132         | 5.46E-13  | 4.45E-13  | 4.09E-13  | 3.38E-13  |
| 0.0133         | 5.46E-13  | 4.45E-13  | 4.09E-13  | 3.38E-13  |
| 0.02           | 5.46E-13  | 4.45E-13  | 4.09E-13  | 3.38E-13  |
| 0.0268         | 5.46E-13  | 4.45E-13  | 4.09E-13  | 3.38E-13  |
| 0.0316         | 5.46E-13  | 4.45E-13  | 4.09E-13  | 3.38E-13  |
| 0.0333         | 5.46E-13  | 4.45E-13  | 4.09E-13  | 3.38E-13  |
| 0.04           | 5.46E-13  | 4.45E-13  | 4.09E-13  | 3.38E-13  |
| 0.0401         | 5.46E-13  | 4.45E-13  | 4.09E-13  | 3.38E-13  |
| 0.0533         | 5.46E-13  | 4.45E-13  | 4.09E-13  | 3.38E-13  |
| 0.0666         | 5.46E-13  | 4.45E-13  | 4.09E-13  | 3.38E-13  |
| 0.08           | 5.46E-13  | 4.45E-13  | 4.09E-13  | 3.38E-13  |
| 0.1            | 5.46E-13  | 4.45E-13  | 4.09E-13  | 3.38E-13  |
| 0.107          | 5.46E-13  | 4.45E-13  | 4.09E-13  | 3.38E-13  |
| 0.133          | 5.46E-13  | 4.45E-13  | 4.09E-13  | 3.38E-13  |
| 0.134          | 5.46E-13  | 4.45E-13  | 4.09E-13  | 3.38E-13  |
| 0.178          | 5.46E-13  | 4.45E-13  | 4.09E-13  | 3.38E-13  |
| 0.316          | 5.46E-13  | 4.45E-13  | 4.09E-13  | 3.38E-13  |
| 0.562          | 5.46E-13  | 4.45E-13  | 4.09E-13  | 3.38E-13  |
| 1              | 5.46E-13  | 4.45E-13  | 4.09E-13  | 3.38E-13  |
| 1.01           | 5.46E-13  | 4.45E-13  | 4.09E-13  | 3.38E-13  |
| 1.78           | 5.46E-13  | 4.45E-13  | 4.09E-13  | 3.38E-13  |

|                |           |           |           |           |
|----------------|-----------|-----------|-----------|-----------|
| 2              | 5.46E-13  | 4.45E-13  | 4.09E-13  | 3.38E-13  |
| 3.16           | 5.46E-13  | 4.45E-13  | 4.09E-13  | 3.38E-13  |
| 5              | 5.46E-13  | 4.45E-13  | 4.09E-13  | 3.38E-13  |
| 5.62           | 5.46E-13  | 4.45E-13  | 4.09E-13  | 3.38E-13  |
| 10             | 5.46E-13  | 4.45E-13  | 4.09E-13  | 3.38E-13  |
| 31.6           | 5.46E-13  | 4.45E-13  | 4.09E-13  | 3.38E-13  |
| 50             | 5.46E-13  | 4.45E-13  | 4.09E-13  | 3.38E-13  |
| 100            | 5.46E-13  | 4.45E-13  | 4.09E-13  | 3.38E-13  |
| 1000           | 5.46E-13  | 4.45E-13  | 4.09E-13  | 3.38E-13  |
| <i>P</i> (bar) | T = 283 K | T = 290 K | T = 293 K | T = 294 K |
| 0.00533        | 3.13E-13  | 2.63E-13  | 2.45E-13  | 2.39E-13  |
| 0.00666        | 3.13E-13  | 2.63E-13  | 2.45E-13  | 2.39E-13  |
| 0.00679        | 3.13E-13  | 2.63E-13  | 2.45E-13  | 2.39E-13  |
| 0.0132         | 3.13E-13  | 2.63E-13  | 2.45E-13  | 2.39E-13  |
| 0.0133         | 3.13E-13  | 2.63E-13  | 2.45E-13  | 2.39E-13  |
| 0.02           | 3.13E-13  | 2.63E-13  | 2.45E-13  | 2.39E-13  |
| 0.0268         | 3.13E-13  | 2.63E-13  | 2.45E-13  | 2.39E-13  |
| 0.0316         | 3.13E-13  | 2.63E-13  | 2.45E-13  | 2.39E-13  |
| 0.0333         | 3.13E-13  | 2.63E-13  | 2.45E-13  | 2.39E-13  |
| 0.04           | 3.13E-13  | 2.63E-13  | 2.45E-13  | 2.39E-13  |
| 0.0401         | 3.13E-13  | 2.63E-13  | 2.45E-13  | 2.39E-13  |
| 0.0533         | 3.13E-13  | 2.63E-13  | 2.45E-13  | 2.39E-13  |
| 0.0666         | 3.13E-13  | 2.63E-13  | 2.45E-13  | 2.39E-13  |
| 0.08           | 3.13E-13  | 2.63E-13  | 2.45E-13  | 2.39E-13  |
| 0.1            | 3.13E-13  | 2.63E-13  | 2.45E-13  | 2.39E-13  |
| 0.107          | 3.13E-13  | 2.63E-13  | 2.45E-13  | 2.39E-13  |
| 0.133          | 3.13E-13  | 2.63E-13  | 2.45E-13  | 2.39E-13  |
| 0.134          | 3.13E-13  | 2.63E-13  | 2.45E-13  | 2.39E-13  |
| 0.178          | 3.13E-13  | 2.63E-13  | 2.45E-13  | 2.39E-13  |
| 0.316          | 3.13E-13  | 2.63E-13  | 2.45E-13  | 2.39E-13  |
| 0.562          | 3.13E-13  | 2.63E-13  | 2.45E-13  | 2.39E-13  |
| 1              | 3.13E-13  | 2.63E-13  | 2.45E-13  | 2.39E-13  |
| 1.01           | 3.13E-13  | 2.63E-13  | 2.45E-13  | 2.39E-13  |
| 1.78           | 3.13E-13  | 2.63E-13  | 2.45E-13  | 2.39E-13  |
| 2              | 3.13E-13  | 2.63E-13  | 2.45E-13  | 2.39E-13  |
| 3.16           | 3.13E-13  | 2.63E-13  | 2.45E-13  | 2.39E-13  |
| 5              | 3.13E-13  | 2.63E-13  | 2.45E-13  | 2.39E-13  |
| 5.62           | 3.13E-13  | 2.63E-13  | 2.45E-13  | 2.39E-13  |
| 10             | 3.13E-13  | 2.63E-13  | 2.45E-13  | 2.39E-13  |
| 31.6           | 3.13E-13  | 2.63E-13  | 2.45E-13  | 2.39E-13  |
| 50             | 3.13E-13  | 2.63E-13  | 2.45E-13  | 2.39E-13  |
| 100            | 3.13E-13  | 2.63E-13  | 2.45E-13  | 2.39E-13  |
| 1000           | 3.13E-13  | 2.63E-13  | 2.45E-13  | 2.39E-13  |



|                |           |           |           |           |
|----------------|-----------|-----------|-----------|-----------|
| <i>P</i> (bar) | T = 297 K | T = 298 K | T = 300 K | T = 302 K |
| 0.00533        | 2.23E-13  | 2.18E-13  | 2.09E-13  | 2.00E-13  |
| 0.00666        | 2.23E-13  | 2.18E-13  | 2.09E-13  | 2.00E-13  |
| 0.00679        | 2.23E-13  | 2.18E-13  | 2.09E-13  | 2.00E-13  |
| 0.0132         | 2.23E-13  | 2.18E-13  | 2.09E-13  | 2.00E-13  |
| 0.0133         | 2.23E-13  | 2.18E-13  | 2.09E-13  | 2.00E-13  |
| 0.02           | 2.23E-13  | 2.18E-13  | 2.09E-13  | 2.00E-13  |
| 0.0268         | 2.23E-13  | 2.18E-13  | 2.09E-13  | 2.00E-13  |
| 0.0316         | 2.23E-13  | 2.18E-13  | 2.09E-13  | 2.00E-13  |
| 0.0333         | 2.23E-13  | 2.18E-13  | 2.09E-13  | 2.00E-13  |
| 0.04           | 2.23E-13  | 2.18E-13  | 2.09E-13  | 2.00E-13  |
| 0.0401         | 2.23E-13  | 2.18E-13  | 2.09E-13  | 2.00E-13  |
| 0.0533         | 2.23E-13  | 2.18E-13  | 2.09E-13  | 2.00E-13  |
| 0.0666         | 2.23E-13  | 2.18E-13  | 2.09E-13  | 2.00E-13  |
| 0.08           | 2.23E-13  | 2.18E-13  | 2.09E-13  | 2.00E-13  |
| 0.1            | 2.23E-13  | 2.18E-13  | 2.09E-13  | 2.00E-13  |
| 0.107          | 2.23E-13  | 2.18E-13  | 2.09E-13  | 2.00E-13  |
| 0.133          | 2.23E-13  | 2.18E-13  | 2.09E-13  | 2.00E-13  |
| 0.134          | 2.23E-13  | 2.18E-13  | 2.09E-13  | 2.00E-13  |
| 0.178          | 2.23E-13  | 2.18E-13  | 2.09E-13  | 2.00E-13  |
| 0.316          | 2.23E-13  | 2.18E-13  | 2.09E-13  | 2.00E-13  |
| 0.562          | 2.23E-13  | 2.18E-13  | 2.09E-13  | 2.00E-13  |
| 1              | 2.23E-13  | 2.18E-13  | 2.09E-13  | 2.00E-13  |
| 1.01           | 2.23E-13  | 2.18E-13  | 2.09E-13  | 2.00E-13  |
| 1.78           | 2.23E-13  | 2.18E-13  | 2.09E-13  | 2.00E-13  |
| 2              | 2.23E-13  | 2.18E-13  | 2.09E-13  | 2.00E-13  |
| 3.16           | 2.23E-13  | 2.18E-13  | 2.09E-13  | 2.00E-13  |
| 5              | 2.23E-13  | 2.18E-13  | 2.09E-13  | 2.00E-13  |
| 5.62           | 2.23E-13  | 2.18E-13  | 2.09E-13  | 2.00E-13  |
| 10             | 2.23E-13  | 2.18E-13  | 2.09E-13  | 2.00E-13  |
| 31.6           | 2.23E-13  | 2.18E-13  | 2.09E-13  | 2.00E-13  |
| 50             | 2.23E-13  | 2.18E-13  | 2.09E-13  | 2.00E-13  |
| 100            | 2.23E-13  | 2.18E-13  | 2.09E-13  | 2.00E-13  |
| 1000           | 2.23E-13  | 2.18E-13  | 2.09E-13  | 2.00E-13  |
| <i>P</i> (bar) | T = 310 K | T = 311 K | T = 312 K | T = 320 K |
| 0.00533        | 1.68E-13  | 1.65E-13  | 1.62E-13  | 1.38E-13  |
| 0.00666        | 1.68E-13  | 1.65E-13  | 1.62E-13  | 1.38E-13  |
| 0.00679        | 1.68E-13  | 1.65E-13  | 1.62E-13  | 1.38E-13  |
| 0.0132         | 1.68E-13  | 1.65E-13  | 1.62E-13  | 1.38E-13  |
| 0.0133         | 1.68E-13  | 1.65E-13  | 1.62E-13  | 1.38E-13  |
| 0.02           | 1.68E-13  | 1.65E-13  | 1.62E-13  | 1.38E-13  |
| 0.0268         | 1.68E-13  | 1.65E-13  | 1.62E-13  | 1.38E-13  |
| 0.0316         | 1.68E-13  | 1.65E-13  | 1.62E-13  | 1.38E-13  |

|                |           |           |           |          |
|----------------|-----------|-----------|-----------|----------|
| 0.0333         | 1.68E-13  | 1.65E-13  | 1.62E-13  | 1.38E-13 |
| 0.04           | 1.68E-13  | 1.65E-13  | 1.62E-13  | 1.38E-13 |
| 0.0401         | 1.68E-13  | 1.65E-13  | 1.62E-13  | 1.38E-13 |
| 0.0533         | 1.68E-13  | 1.65E-13  | 1.62E-13  | 1.38E-13 |
| 0.0666         | 1.68E-13  | 1.65E-13  | 1.62E-13  | 1.38E-13 |
| 0.08           | 1.68E-13  | 1.65E-13  | 1.62E-13  | 1.38E-13 |
| 0.1            | 1.68E-13  | 1.65E-13  | 1.62E-13  | 1.38E-13 |
| 0.107          | 1.68E-13  | 1.65E-13  | 1.62E-13  | 1.38E-13 |
| 0.133          | 1.68E-13  | 1.65E-13  | 1.62E-13  | 1.38E-13 |
| 0.134          | 1.68E-13  | 1.65E-13  | 1.62E-13  | 1.38E-13 |
| 0.178          | 1.68E-13  | 1.65E-13  | 1.62E-13  | 1.38E-13 |
| 0.316          | 1.68E-13  | 1.65E-13  | 1.62E-13  | 1.38E-13 |
| 0.562          | 1.68E-13  | 1.65E-13  | 1.62E-13  | 1.38E-13 |
| 1              | 1.68E-13  | 1.65E-13  | 1.62E-13  | 1.38E-13 |
| 1.01           | 1.68E-13  | 1.65E-13  | 1.62E-13  | 1.38E-13 |
| 1.78           | 1.68E-13  | 1.65E-13  | 1.62E-13  | 1.38E-13 |
| 2              | 1.68E-13  | 1.65E-13  | 1.62E-13  | 1.38E-13 |
| 3.16           | 1.68E-13  | 1.65E-13  | 1.62E-13  | 1.38E-13 |
| 5              | 1.68E-13  | 1.65E-13  | 1.62E-13  | 1.38E-13 |
| 5.62           | 1.68E-13  | 1.65E-13  | 1.62E-13  | 1.38E-13 |
| 10             | 1.68E-13  | 1.65E-13  | 1.62E-13  | 1.38E-13 |
| 31.6           | 1.68E-13  | 1.65E-13  | 1.62E-13  | 1.38E-13 |
| 50             | 1.68E-13  | 1.65E-13  | 1.62E-13  | 1.38E-13 |
| 100            | 1.68E-13  | 1.65E-13  | 1.62E-13  | 1.38E-13 |
| 1000           | 1.68E-13  | 1.65E-13  | 1.62E-13  | 1.38E-13 |
| <i>P</i> (bar) | T = 330 K | T = 340 K | T = 350 K |          |
| 0.00533        | 1.15E-13  | 9.67E-14  | 8.24E-14  |          |
| 0.00666        | 1.15E-13  | 9.67E-14  | 8.24E-14  |          |
| 0.00679        | 1.15E-13  | 9.67E-14  | 8.24E-14  |          |
| 0.0132         | 1.15E-13  | 9.67E-14  | 8.24E-14  |          |
| 0.0133         | 1.15E-13  | 9.67E-14  | 8.24E-14  |          |
| 0.02           | 1.15E-13  | 9.67E-14  | 8.24E-14  |          |
| 0.0268         | 1.15E-13  | 9.67E-14  | 8.24E-14  |          |
| 0.0316         | 1.15E-13  | 9.67E-14  | 8.24E-14  |          |
| 0.0333         | 1.15E-13  | 9.67E-14  | 8.24E-14  |          |
| 0.04           | 1.15E-13  | 9.67E-14  | 8.24E-14  |          |
| 0.0401         | 1.15E-13  | 9.67E-14  | 8.24E-14  |          |
| 0.0533         | 1.15E-13  | 9.67E-14  | 8.24E-14  |          |
| 0.0666         | 1.15E-13  | 9.67E-14  | 8.24E-14  |          |
| 0.08           | 1.15E-13  | 9.67E-14  | 8.24E-14  |          |
| 0.1            | 1.15E-13  | 9.67E-14  | 8.24E-14  |          |
| 0.107          | 1.15E-13  | 9.67E-14  | 8.24E-14  |          |
| 0.133          | 1.15E-13  | 9.67E-14  | 8.24E-14  |          |

---

|       |          |          |          |  |
|-------|----------|----------|----------|--|
| 0.134 | 1.15E-13 | 9.67E-14 | 8.24E-14 |  |
| 0.178 | 1.15E-13 | 9.67E-14 | 8.24E-14 |  |
| 0.316 | 1.15E-13 | 9.67E-14 | 8.24E-14 |  |
| 0.562 | 1.15E-13 | 9.67E-14 | 8.24E-14 |  |
| 1     | 1.15E-13 | 9.67E-14 | 8.24E-14 |  |
| 1.01  | 1.15E-13 | 9.67E-14 | 8.24E-14 |  |
| 1.78  | 1.15E-13 | 9.67E-14 | 8.24E-14 |  |
| 2     | 1.15E-13 | 9.67E-14 | 8.24E-14 |  |
| 3.16  | 1.15E-13 | 9.67E-14 | 8.24E-14 |  |
| 5     | 1.15E-13 | 9.67E-14 | 8.24E-14 |  |
| 5.62  | 1.15E-13 | 9.67E-14 | 8.24E-14 |  |
| 10    | 1.15E-13 | 9.67E-14 | 8.24E-14 |  |
| 31.6  | 1.15E-13 | 9.67E-14 | 8.24E-14 |  |
| 50    | 1.15E-13 | 9.67E-14 | 8.24E-14 |  |
| 100   | 1.15E-13 | 9.67E-14 | 8.24E-14 |  |
| 1000  | 1.15E-13 | 9.67E-14 | 8.24E-14 |  |

<sup>a</sup>The high-pressure limit rate constants were done by the dual-level method with W3X-L//DF-CCSD(T)-F12b/jun-cc-pVDZ for the high level and M11-L/MG3S for the low-level. The pressure-dependent rate constants were done using SS-QRRK/SCT for the tight TS.

**Table S3.** The tunneling transmission coefficient ( $\kappa_{TSA}$ , *unitless*), recrossing transmission coefficient ( $\Gamma_{TSA}$ , *unitless*), conventional transition state theory rate constant ( $k_{TSA}^\ddagger$ ,  $\text{cm}^3 \text{ molecule}^{-1} \text{ s}^{-1}$ ), and CVT/SCT rate constant ( $k_{TSA}^{CVT/SCT}$ ,  $\text{cm}^3 \text{ molecule}^{-1} \text{ s}^{-1}$ ), each calculated using only transition state TSA. The transmission coefficients are calculated at the lower level, the conventional transition state theory rate constant is calculated at the higher level, and the CVT/SCT rate constant is the dual-level result.

| $T$ (K) | $\kappa_{TSA}^a$ | $\Gamma_{TSA}^b$      | $k_{TSA}^\ddagger^c$   | $k_{TSA}^{CVT/SCT}{}^d$ |
|---------|------------------|-----------------------|------------------------|-------------------------|
| 190     | 1.03             | $8.98 \times 10^{-1}$ | $1.22 \times 10^{-8}$  | $1.12 \times 10^{-8}$   |
| 200     | 1.02             | $8.97 \times 10^{-1}$ | $6.34 \times 10^{-9}$  | $5.83 \times 10^{-9}$   |
| 210     | 1.02             | $8.97 \times 10^{-1}$ | $3.54 \times 10^{-9}$  | $3.24 \times 10^{-9}$   |
| 220     | 1.02             | $8.96 \times 10^{-1}$ | $2.09 \times 10^{-9}$  | $1.91 \times 10^{-9}$   |
| 230     | 1.02             | $8.96 \times 10^{-1}$ | $1.30 \times 10^{-9}$  | $1.19 \times 10^{-9}$   |
| 240     | 1.02             | $8.95 \times 10^{-1}$ | $8.49 \times 10^{-10}$ | $7.73 \times 10^{-10}$  |
| 250     | 1.02             | $8.95 \times 10^{-1}$ | $5.75 \times 10^{-10}$ | $5.22 \times 10^{-10}$  |
| 260     | 1.01             | $8.95 \times 10^{-1}$ | $4.03 \times 10^{-10}$ | $3.66 \times 10^{-10}$  |
| 270     | 1.01             | $8.94 \times 10^{-1}$ | $2.91 \times 10^{-10}$ | $2.64 \times 10^{-10}$  |
| 273     | 1.01             | $8.94 \times 10^{-1}$ | $2.65 \times 10^{-10}$ | $2.40 \times 10^{-10}$  |
| 280     | 1.01             | $8.94 \times 10^{-1}$ | $2.16 \times 10^{-10}$ | $1.95 \times 10^{-10}$  |
| 290     | 1.01             | $8.94 \times 10^{-1}$ | $1.64 \times 10^{-10}$ | $1.48 \times 10^{-10}$  |
| 298     | 1.01             | $8.94 \times 10^{-1}$ | $1.34 \times 10^{-10}$ | $1.21 \times 10^{-10}$  |
| 300     | 1.01             | $8.94 \times 10^{-1}$ | $1.27 \times 10^{-10}$ | $1.15 \times 10^{-10}$  |
| 310     | 1.01             | $8.93 \times 10^{-1}$ | $1.01 \times 10^{-10}$ | $9.10 \times 10^{-11}$  |
| 320     | 1.01             | $8.93 \times 10^{-1}$ | $8.12 \times 10^{-11}$ | $7.33 \times 10^{-11}$  |
| 330     | 1.01             | $8.93 \times 10^{-1}$ | $6.65 \times 10^{-11}$ | $5.99 \times 10^{-11}$  |
| 340     | 1.01             | $8.93 \times 10^{-1}$ | $5.52 \times 10^{-11}$ | $4.97 \times 10^{-11}$  |
| 350     | 1.01             | $8.93 \times 10^{-1}$ | $4.64 \times 10^{-11}$ | $4.18 \times 10^{-11}$  |

<sup>a</sup> The M11-L/MG3S tunneling transmission coefficient calculated by the small-curvature tunneling approximation

$$\frac{k_{TSA}^{CVT}}{\Gamma_{TSA}}$$

<sup>b</sup> The M11-L/MG3S recrossing transmission coefficient calculated by  $\Gamma_{TSA} = k_{TSA}^\ddagger$ , where  $k_{TSA}^{CVT}$  and  $k_{TSA}^\ddagger$  are respectively the canonical variational transition state theory rate constant and the conventional transition state theory rate constant

<sup>c</sup> The W3X-L//DF-CCSD(T)-F12b/jun-cc-pVDZ conventional transition state theory rate constant

$${}^d k_{TSA}^{CVT/SCT} = \kappa_{TSA} \Gamma_{TSA} k_{TSA}^\ddagger$$



**Table S4.** The tunneling transmission coefficient ( $\kappa_{TSB}$ , *unitless*), recrossing transmission coefficient ( $\Gamma_{TSB}$ , *unitless*), conventional transition state theory rate constant ( $k_{TSB}^\ddagger$ ,  $\text{cm}^3 \text{ molecule}^{-1} \text{ s}^{-1}$ ), and CVT/SCT rate constant ( $k_{TSB}^{CVT/SCT}$ ,  $\text{cm}^3 \text{ molecule}^{-1} \text{ s}^{-1}$ ), each calculated using only transition state TSB. The transmission coefficients are calculated at the lower level, the conventional transition state theory rate constant is calculated at the higher level, and the CVT/SCT rate constant is the dual-level result.

| $T$ (K) | $\kappa_{TSB}^a$ | $\Gamma_{TSB}^b$      | $k_{TSB}^\ddagger^c$   | $k_{TSB}^{CVT/SCT}{}^d$ |
|---------|------------------|-----------------------|------------------------|-------------------------|
| 190     | 1.49             | $9.83 \times 10^{-1}$ | $9.07 \times 10^{-12}$ | $1.33 \times 10^{-11}$  |
| 200     | 1.43             | $9.83 \times 10^{-1}$ | $5.24 \times 10^{-12}$ | $7.37 \times 10^{-12}$  |
| 210     | 1.38             | $9.82 \times 10^{-1}$ | $3.19 \times 10^{-12}$ | $4.34 \times 10^{-12}$  |
| 220     | 1.34             | $9.81 \times 10^{-1}$ | $2.05 \times 10^{-12}$ | $2.69 \times 10^{-12}$  |
| 230     | 1.31             | $9.80 \times 10^{-1}$ | $1.37 \times 10^{-12}$ | $1.75 \times 10^{-12}$  |
| 240     | 1.28             | $9.79 \times 10^{-1}$ | $9.46 \times 10^{-13}$ | $1.18 \times 10^{-12}$  |
| 250     | 1.25             | $9.79 \times 10^{-1}$ | $6.77 \times 10^{-13}$ | $8.30 \times 10^{-13}$  |
| 260     | 1.23             | $9.78 \times 10^{-1}$ | $4.99 \times 10^{-13}$ | $6.00 \times 10^{-13}$  |
| 270     | 1.21             | $9.77 \times 10^{-1}$ | $3.76 \times 10^{-13}$ | $4.45 \times 10^{-13}$  |
| 273     | 1.21             | $9.77 \times 10^{-1}$ | $3.48 \times 10^{-13}$ | $4.09 \times 10^{-13}$  |
| 280     | 1.19             | $9.76 \times 10^{-1}$ | $2.91 \times 10^{-13}$ | $3.39 \times 10^{-13}$  |
| 290     | 1.18             | $9.75 \times 10^{-1}$ | $2.29 \times 10^{-13}$ | $2.64 \times 10^{-13}$  |
| 298     | 1.17             | $9.74 \times 10^{-1}$ | $1.92 \times 10^{-13}$ | $2.19 \times 10^{-13}$  |
| 300     | 1.17             | $9.74 \times 10^{-1}$ | $1.84 \times 10^{-13}$ | $2.09 \times 10^{-13}$  |
| 310     | 1.16             | $9.73 \times 10^{-1}$ | $1.50 \times 10^{-13}$ | $1.69 \times 10^{-13}$  |
| 320     | 1.14             | $9.72 \times 10^{-1}$ | $1.24 \times 10^{-13}$ | $1.38 \times 10^{-13}$  |
| 330     | 1.14             | $9.71 \times 10^{-1}$ | $1.04 \times 10^{-13}$ | $1.15 \times 10^{-13}$  |
| 340     | 1.13             | $9.70 \times 10^{-1}$ | $8.86 \times 10^{-14}$ | $9.69 \times 10^{-14}$  |
| 350     | 1.12             | $9.70 \times 10^{-1}$ | $7.61 \times 10^{-14}$ | $8.26 \times 10^{-14}$  |

<sup>a</sup> The M11-L/MG3S tunneling transmission coefficient calculated by the small-curvature tunneling approximation

<sup>b</sup> The M11-L/MG3S recrossing transmission coefficient calculated by  $\Gamma_{TSB} = \frac{k_{TSB}^{CVT}}{k_{TSB}^\ddagger}$ , where  $k_{TSB}^{CVT}$  and  $k_{TSB}^\ddagger$  are respectively the canonical variational transition state theory rate constant and the conventional transition state theory rate constant

<sup>c</sup> The W3X-L//DF-CCSD(T)-F12b/jun-cc-pVDZ conventional transition state theory rate constant

---

$${}_d k_{TSB}^{CVT/SCT} = \kappa_{TSB} \Gamma_{TSB} k_{TSB}^{\ddagger}$$

**Table S5.** The forward-reaction Arrhenius activation energies ( $\text{kcal mol}^{-1}$ ) for the  $\text{CH}_2\text{OO} + \text{CH}_3\text{C}(\text{O})\text{CH}_3$  reaction based on the local slope at a given temperature of an Arrhenius plot of the fit to the rate constant (see eqns (4) and (5)).

| $T/\text{K}$ | $E_a/\text{kcal mol}^{-1}$ |
|--------------|----------------------------|
| 190          | -4.46                      |
| 200          | -4.43                      |
| 210          | -4.4                       |
| 220          | -4.36                      |
| 230          | -4.31                      |
| 240          | -4.27                      |
| 250          | -4.22                      |
| 252          | -4.22                      |
| 254          | -4.21                      |
| 256          | -4.2                       |
| 258          | -4.19                      |
| 260          | -4.18                      |
| 263          | -4.16                      |
| 270          | -4.13                      |
| 273          | -4.12                      |
| 280          | -4.08                      |
| 283          | -4.07                      |
| 290          | -4.04                      |
| 293          | -4.02                      |
| 294          | -4.02                      |
| 297          | -4.00                      |
| 298          | -4.00                      |
| 300          | -3.99                      |
| 302          | -3.98                      |
| 310          | -3.94                      |
| 311          | -3.93                      |
| 312          | -3.93                      |
| 320          | -3.89                      |
| 330          | -3.84                      |
| 340          | -3.79                      |
| 350          | -3.75                      |



**Table S6.** The value of  $\nu$  at concentration  $\text{CH}_2\text{OO}$  is  $5 \times 10^4$  molecule  $\text{cm}^{-3}$  and concentration OH is as follows (molecule  $\text{cm}^{-3}$ ).

| T/K | $[\text{OH}] = 1 \times 10^4$ | $[\text{OH}] = 1 \times 10^5$ | $[\text{OH}] = 1 \times 10^6$ |
|-----|-------------------------------|-------------------------------|-------------------------------|
| 200 | 245.33                        | 24.53                         | 2.45                          |
| 220 | 96.07                         | 9.61                          | 0.96                          |
| 240 | 42.14                         | 4.21                          | 0.42                          |
| 260 | 21.39                         | 2.14                          | 0.21                          |
| 280 | 10.56                         | 1.06                          | 0.11                          |
| 298 | 6.06                          | 0.61                          | 0.06                          |
| 300 | 5.81                          | 0.58                          | 0.06                          |
| 320 | 3.29                          | 0.33                          | 0.03                          |
| 340 | 2.01                          | 0.20                          | 0.02                          |

**Table S7.** The value of  $\nu$  at concentration  $\text{CH}_2\text{OO}$  is  $5 \times 10^5$  molecule  $\text{cm}^{-3}$  and concentration  $\text{OH}$  is as follows (molecule  $\text{cm}^{-3}$ ).

| T/K | $[\text{OH}] = 1 \times 10^4$ | $[\text{OH}] = 1 \times 10^5$ | $[\text{OH}] = 1 \times 10^6$ |
|-----|-------------------------------|-------------------------------|-------------------------------|
| 200 | 2453.33                       | 245.33                        | 24.53                         |
| 220 | 960.71                        | 96.07                         | 9.61                          |
| 240 | 421.43                        | 42.14                         | 4.21                          |
| 260 | 213.93                        | 21.39                         | 2.14                          |
| 280 | 105.63                        | 10.56                         | 1.06                          |
| 298 | 60.56                         | 6.06                          | 0.61                          |
| 300 | 58.06                         | 5.81                          | 0.58                          |
| 320 | 32.86                         | 3.29                          | 0.33                          |
| 340 | 20.15                         | 2.01                          | 0.20                          |

**Table S8.** The Cartesian coordinates (Å) of the optimized geometries (which are also used for frequency calculations) by DF-CCSD(T)-F12b/jun-cc-pVDZ.

|                                     |   |               |               |               |
|-------------------------------------|---|---------------|---------------|---------------|
| CH <sub>2</sub> OO                  | C | -1.0671982554 | 0.2090688552  | -0.0000127752 |
|                                     | H | -1.9805889031 | -0.3837516053 | 0.0002305376  |
|                                     | H | -0.9970848188 | 1.2991181620  | 0.0003459231  |
|                                     | O | 0.0114263246  | -0.4726660019 | -0.0000440799 |
|                                     | O | 1.1769796527  | 0.1924535899  | 0.0000253944  |
| CH <sub>3</sub> C(O)CH <sub>3</sub> | C | -0.0000004341 | 0.1843485513  | -0.0000018776 |
|                                     | C | -1.2885068468 | -0.6120515884 | 0.0313697027  |
|                                     | H | -2.1470584460 | 0.0664659834  | 0.1002876761  |
|                                     | H | -1.3680872949 | -1.2232997228 | -0.8815295317 |
|                                     | H | -1.2839205629 | -1.3039061568 | 0.8880768871  |
|                                     | C | 1.2885155831  | -0.6120362856 | -0.0313674219 |
|                                     | H | 1.2839376760  | -1.3038973257 | -0.8880694244 |
|                                     | H | 2.1470590034  | 0.0664911214  | -0.1002904488 |
|                                     | H | 1.3681033635  | -1.2232766235 | 0.8815363938  |
|                                     | O | -0.0000077912 | 1.4042193067  | -0.0000065154 |
| CA                                  | C | 1.8503680420  | -1.2164512977 | 0.1461775342  |
|                                     | O | 2.3093110077  | -0.1865369153 | -0.4225073634 |
|                                     | O | 2.3991913637  | 0.9533354571  | 0.3356041923  |
|                                     | H | 1.5847074124  | -1.1637925366 | 1.2031273054  |
|                                     | H | 1.7655944594  | -2.0994094974 | -0.4869885291 |
|                                     | O | -0.8095644454 | -1.0109718942 | 0.1039000815  |
|                                     | C | -1.5027740322 | -0.0043706733 | 0.0096483613  |
|                                     | C | -0.9061987020 | 1.3808265873  | -0.0629418344 |
|                                     | H | -1.0528944985 | 1.7698718714  | -1.0844156790 |
|                                     | H | -1.4439042603 | 2.0581920718  | 0.6185106776  |
|                                     | H | 0.1674246473  | 1.3692877270  | 0.1702985013  |
|                                     | C | -3.0118788908 | -0.1039715424 | -0.0434471942 |
|                                     | H | -3.4321494086 | 0.3278981895  | 0.8789172683  |
|                                     | H | -3.4035335165 | 0.4855043421  | -0.8863885977 |
|                                     | H | -3.3208761781 | -1.1522158893 | -0.1330107242 |

|     |    |               |               |               |
|-----|----|---------------|---------------|---------------|
| TSA | C  | -2.0393275856 | -1.0074557243 | -0.4188731896 |
|     | O  | -2.1229867148 | -0.2188195591 | 0.5667626669  |
|     | O  | -1.9887843796 | 1.1142154777  | 0.3105246620  |
|     | H  | -1.8895218377 | -0.5932801262 | -1.4171280765 |
|     | H  | -2.1175096413 | -2.0659769141 | -0.1717652297 |
|     | O  | 0.6470938345  | -0.9789259906 | -0.4962174016 |
|     | C  | 1.3997317128  | -0.0719435855 | -0.1615471468 |
|     | C  | 1.1722422550  | 1.3564157365  | -0.5983319236 |
|     | H  | 0.1242263608  | 1.5001393301  | -0.8866152816 |
|     | H  | 1.4354310587  | 2.0571945191  | 0.2073969352  |
|     | H  | 1.8372567656  | 1.5640010807  | -1.4535021915 |
|     | C  | 2.6135889251  | -0.3409574936 | 0.6997628246  |
|     | H  | 3.5039831437  | 0.1400909761  | 0.2664766071  |
|     | H  | 2.4497456852  | 0.1095169245  | 1.6920231789  |
|     | H  | 2.7742804175  | -1.4204166512 | 0.8069285660  |
|     | CB | C             | 2.0996120123  | 0.5939720054  |
| O   |    | 1.8522426511  | -0.2494164390 | 0.4623893855  |
| O   |    | 1.0400947901  | -1.2924423123 | 0.1280504058  |
| H   |    | 1.6967164332  | 0.4308045411  | -1.4493825101 |
| H   |    | 2.7213946744  | 1.4337470472  | -0.1373853154 |
| O   |    | -0.4542958598 | 1.2661096346  | -0.5194711254 |
| C   |    | -1.1199041681 | 0.3396157157  | -0.0652596075 |
| C   |    | -1.4136606843 | 0.2289273432  | 1.4139159462  |
| H   |    | -2.5037393414 | 0.2285646116  | 1.5753012793  |
| H   |    | -1.0123692870 | -0.7228027846 | 1.7912090836  |
| H   |    | -0.9585220425 | 1.0700177164  | 1.9516148304  |
| C   |    | -1.7515414629 | -0.6975019040 | -0.9646602844 |
| H   |    | -1.5922727843 | -1.7046090389 | -0.5550628178 |
| H   |    | -2.8377064021 | -0.5120081987 | -1.0097173621 |
| H   |    | -1.3280335287 | -0.6278569376 | -1.9736915538 |

|     |   |               |               |               |
|-----|---|---------------|---------------|---------------|
| TSB | C | 1.8566909451  | -0.5314618177 | -0.3738767006 |
|     | O | 1.6607772051  | 0.5760148763  | 0.2195591136  |
|     | O | 0.6590699938  | 0.4704486406  | 1.1695821118  |
|     | H | 1.5590899387  | -1.4598063444 | 0.1118309739  |
|     | H | 2.5254946744  | -0.4783466693 | -1.2352608552 |
|     | O | -0.1185882720 | -0.5799516540 | -1.1731467964 |
|     | C | -0.8604421176 | -0.1250876443 | -0.2671538306 |
|     | C | -1.4376989406 | 1.2649395015  | -0.4155631762 |
|     | H | -2.3142240343 | 1.1977870562  | -1.0826317000 |
|     | H | -1.7553020561 | 1.6786403067  | 0.5500709562  |
|     | H | -0.6944593283 | 1.9241454008  | -0.8817970854 |
|     | C | -1.5272537568 | -1.0614743012 | 0.7136645488  |
|     | H | -1.6769812851 | -0.5777558117 | 1.6881947774  |
|     | H | -2.5131546799 | -1.3404870240 | 0.3038868791  |
|     | H | -0.9274332862 | -1.9726275155 | 0.8339477837  |
|     | P | C             | 1.5931441024  | 0.4213670418  |
| H   |   | 2.3309816244  | 0.0321228292  | 1.1721389726  |
| H   |   | 1.8702646440  | 1.4142550830  | 0.0646868408  |
| O   |   | 1.4946283661  | -0.5148033792 | -0.5920900223 |
| O   |   | 0.2214278141  | -0.0743337918 | -1.1531134134 |
| C   |   | -0.5939247791 | 0.0019386382  | 0.0270943614  |
| C   |   | -1.6576380111 | 1.0446510648  | -0.2530586087 |
| H   |   | -1.1827057273 | 2.0067610341  | -0.4858682088 |
| H   |   | -2.2831073013 | 0.7280723399  | -1.1002762616 |
| H   |   | -2.2930744864 | 1.1581428006  | 0.6365545423  |
| C   |   | -1.1356298922 | -1.3624612163 | 0.4147827627  |
| H   |   | -1.8479373661 | -1.7140148625 | -0.3458881250 |
| H   |   | -0.3060839825 | -2.0772516233 | 0.4963526430  |
| H   |   | -1.6456562077 | -1.2922825521 | 1.3864844654  |
| O   |   | 0.3091682029  | 0.4597035937  | 1.0448294910  |

**Table S9.** The Cartesian coordinates (Å) of the optimized geometries (which are also used for frequency calculations) by B3LYP/MG3S.

|                                     |   |             |             |             |
|-------------------------------------|---|-------------|-------------|-------------|
| CH <sub>2</sub> OO                  | C | -1.06859300 | 0.20088900  | 0.00011700  |
|                                     | H | -1.97492500 | -0.38738700 | 0.00009300  |
|                                     | H | -1.02501000 | 1.28316200  | 0.00026500  |
|                                     | O | -0.00161800 | -0.45705700 | -0.00006700 |
|                                     | O | 1.17805500  | 0.19441900  | -0.00006600 |
| CH <sub>3</sub> C(O)CH <sub>3</sub> | C | 0.00000000  | 0.00000000  | 0.18437600  |
|                                     | O | 0.00000000  | 0.00000000  | 1.39389100  |
|                                     | C | 0.00000000  | 1.28825600  | -0.61107900 |
|                                     | H | 0.87697500  | 1.33149700  | -1.26036700 |
|                                     | H | -0.87600600 | 1.33083100  | -1.26170600 |
|                                     | H | -0.00078900 | 2.14260200  | 0.05985900  |
|                                     | C | 0.00000000  | -1.28825600 | -0.61107900 |
|                                     | H | -0.87697500 | -1.33149700 | -1.26036700 |
|                                     | H | 0.87600600  | -1.33083100 | -1.26170600 |
|                                     | H | 0.00078900  | -2.14260200 | 0.05985900  |
| CA                                  | C | 1.86941800  | -1.13583200 | 0.13884200  |
|                                     | O | 2.32029000  | -0.12950700 | -0.44501400 |
|                                     | O | 2.38280800  | 1.05073200  | 0.25393800  |
|                                     | H | 1.58514100  | -1.07123900 | 1.17955500  |
|                                     | H | 1.81009200  | -2.03663100 | -0.45500900 |
|                                     | O | -0.80311900 | -1.03969000 | 0.08865100  |
|                                     | C | -1.51934800 | -0.05954200 | 0.01213100  |
|                                     | C | -0.96861200 | 1.34189600  | -0.04235000 |
|                                     | H | -1.14342000 | 1.74992900  | -1.04180100 |
|                                     | H | -1.50614200 | 1.98917400  | 0.65308400  |
|                                     | H | 0.10003400  | 1.36562100  | 0.16629800  |
|                                     | C | -3.02297100 | -0.20727000 | -0.03628300 |
|                                     | H | -3.45806000 | 0.21183200  | 0.87390900  |
|                                     | H | -3.43872000 | 0.35803100  | -0.87192500 |
|                                     | H | -3.29968100 | -1.25450900 | -0.11873700 |

|     |   |             |             |             |
|-----|---|-------------|-------------|-------------|
| TSA | C | 2.09363500  | -0.84651000 | 0.46800000  |
|     | O | 2.13880700  | -0.15414700 | -0.56974200 |
|     | O | 1.85552700  | 1.17771300  | -0.47921100 |
|     | H | 1.85418700  | -0.38334100 | 1.41469200  |
|     | H | 2.29693900  | -1.89957200 | 0.33415500  |
|     | O | -0.64464000 | -0.98719800 | 0.62183800  |
|     | C | -1.40373300 | -0.14596100 | 0.18315600  |
|     | C | -1.35669700 | 1.29083000  | 0.64124400  |
|     | H | -0.38955200 | 1.51736200  | 1.07904100  |
|     | H | -1.55415000 | 1.97602800  | -0.18244800 |
|     | H | -2.14256400 | 1.44286800  | 1.38684200  |
|     | C | -2.45476700 | -0.50223100 | -0.84158800 |
|     | H | -3.42795100 | -0.09787500 | -0.55812100 |
|     | H | -2.18825500 | -0.04336500 | -1.79677600 |
|     | H | -2.51683500 | -1.57982100 | -0.96533800 |
| CB  | C | 2.12325000  | -0.79288900 | -0.02631900 |
|     | O | 1.98809200  | 0.43159900  | -0.23150000 |
|     | O | 1.22383100  | 1.15513100  | 0.63601300  |
|     | H | 1.65655200  | -1.25195500 | 0.83378300  |
|     | H | 2.71734600  | -1.32078700 | -0.75946800 |
|     | O | -0.55841900 | -1.29344000 | -0.37200100 |
|     | C | -1.23045800 | -0.30814400 | -0.13147700 |
|     | C | -1.54954200 | 0.71171100  | -1.19788300 |
|     | H | -2.62714300 | 0.73247300  | -1.37723700 |
|     | H | -1.25321900 | 1.70573700  | -0.86350500 |
|     | H | -1.03483300 | 0.46545300  | -2.12243100 |
|     | C | -1.81373000 | -0.06294300 | 1.23910400  |
|     | H | -1.34763600 | 0.82442400  | 1.66891400  |
|     | H | -2.88642800 | 0.12806300  | 1.17292000  |
|     | H | -1.62979300 | -0.91614000 | 1.88638000  |

|     |   |             |             |             |
|-----|---|-------------|-------------|-------------|
| TSB | C | -1.83098600 | 0.54985200  | -0.36601600 |
|     | O | -1.69997500 | -0.58035400 | 0.17933900  |
|     | O | -0.71472500 | -0.58100000 | 1.15578000  |
|     | H | -1.52965400 | 1.44248700  | 0.15832000  |
|     | H | -2.47324100 | 0.57139400  | -1.23641200 |
|     | O | 0.11300700  | 0.53704900  | -1.16530300 |
|     | C | 0.87704900  | 0.13679200  | -0.26263100 |
|     | C | 1.55465900  | -1.20264700 | -0.41185800 |
|     | H | 2.44993000  | -1.06557400 | -1.02621700 |
|     | H | 1.85846500  | -1.61504200 | 0.54680700  |
|     | H | 0.89473400  | -1.89870700 | -0.92205800 |
|     | C | 1.45772600  | 1.10177500  | 0.73971500  |
|     | H | 1.62829400  | 0.62776400  | 1.70330900  |
|     | H | 2.42222200  | 1.45041800  | 0.35706300  |
|     | H | 0.81210400  | 1.96706600  | 0.86539800  |
|     | P | C           | 1.59894300  | -0.41811500 |
| H   |   | 2.32570400  | -0.01610900 | -1.17012100 |
| H   |   | 1.88522900  | -1.41174100 | -0.10535400 |
| O   |   | 1.50269600  | 0.49204300  | 0.60710400  |
| O   |   | 0.22137700  | 0.08184800  | 1.15377700  |
| C   |   | -0.59805300 | -0.00221700 | -0.02496500 |
| C   |   | -1.65588500 | -1.05257200 | 0.25281000  |
| H   |   | -1.18573500 | -2.00406200 | 0.49019000  |
| H   |   | -2.28589400 | -0.74663300 | 1.08697300  |
| H   |   | -2.28372200 | -1.17619900 | -0.62803800 |
| C   |   | -1.15633600 | 1.35665300  | -0.41274100 |
| H   |   | -1.86861400 | 1.70123900  | 0.33618200  |
| H   |   | -0.34748800 | 2.07942000  | -0.49267500 |
| H   |   | -1.66201100 | 1.28977800  | -1.37519700 |
| O   |   | 0.31224100  | -0.45116500 | -1.04138100 |



**Table S10.** The Cartesian coordinates (Å) of the optimized geometries (which are also used for frequency calculations) by M11-L/MG3S.

|                                       |   |             |             |             |
|---------------------------------------|---|-------------|-------------|-------------|
| CH <sub>2</sub> OO                    | C | -1.05494800 | 0.20065900  | -0.00016800 |
|                                       | H | -1.96977200 | -0.37543600 | 0.00025200  |
|                                       | H | -0.99334700 | 1.28293100  | 0.00041800  |
|                                       | O | -0.00394400 | -0.45596500 | 0.00005900  |
|                                       | O | 1.16554500  | 0.19203400  | -0.00001600 |
| CH <sub>3</sub> C(O)CHCH <sub>2</sub> | C | -1.72758500 | -0.58253200 | -0.00015000 |
|                                       | H | -1.78273200 | -1.24253200 | -0.87572300 |
|                                       | H | -2.58078100 | 0.09855800  | -0.00073000 |
|                                       | H | -1.78333900 | -1.24169900 | 0.87601700  |
|                                       | C | -0.43991200 | 0.17200800  | 0.00003100  |
|                                       | C | 0.78889500  | -0.66129500 | 0.00013400  |
|                                       | H | 0.67294500  | -1.74854300 | 0.00017000  |
|                                       | C | 1.98351600  | -0.10376000 | 0.00019600  |
|                                       | H | 2.07283300  | 0.98481200  | 0.00015500  |
|                                       | H | 2.90333300  | -0.6874210  | 0.00029200  |
|                                       | O | -0.39146700 | 1.36128800  | -0.00018100 |
| C2A                                   | C | 0.34886000  | 1.52781000  | 0.05466500  |
|                                       | H | 0.74358700  | 2.19104900  | 0.83587200  |
|                                       | H | -0.72830000 | 1.38694200  | 0.19144700  |
|                                       | H | 0.52703200  | 2.05756700  | -0.89121800 |
|                                       | C | 1.10394700  | 0.24878700  | 0.05194700  |
|                                       | C | 2.57660200  | 0.37122800  | -0.06947000 |
|                                       | H | 2.99698200  | 1.37705000  | -0.14735000 |
|                                       | C | 3.35051500  | -0.69595200 | -0.08369700 |
|                                       | H | 2.90676200  | -1.69064300 | -0.00459600 |
|                                       | H | 4.43425300  | -0.63149900 | -0.17247600 |
|                                       | O | 0.58167400  | -0.82476000 | 0.13734400  |
|                                       | C | -2.02911900 | -1.20544100 | 0.20840800  |
|                                       | H | -1.80137500 | -1.00100700 | 1.25837200  |
|                                       | H | -1.78265500 | -2.13307200 | -0.30993100 |
|                                       | O | -2.60840500 | -0.35623700 | -0.46748500 |
|                                       | O | -2.89840800 | 0.80162400  | 0.11373600  |

|      |     |             |             |             |
|------|-----|-------------|-------------|-------------|
| TS2A | C   | 0.45242100  | 1.67124100  | 0.43977200  |
|      | H   | 1.16178000  | 2.33829300  | 0.94752700  |
|      | H   | -0.50755100 | 1.66145300  | 0.95885000  |
|      | H   | 0.29623800  | 2.09300400  | -0.56145200 |
|      | C   | 1.02838800  | 0.30641800  | 0.32347300  |
|      | C   | 2.35191700  | 0.22388900  | -0.34002600 |
|      | H   | 2.79579700  | 1.15388200  | -0.70434000 |
|      | C   | 2.97044300  | -0.93116200 | -0.48470000 |
|      | H   | 2.50620600  | -1.84641400 | -0.11126800 |
|      | H   | 3.94248300  | -1.01838500 | -0.96846700 |
|      | O   | 0.48014700  | -0.67513300 | 0.73219400  |
|      | C   | -2.14523400 | -1.05258700 | 0.49363600  |
|      | H   | -2.17039300 | -0.44801900 | 1.40471400  |
|      | H   | -1.98674800 | -2.13156500 | 0.46776600  |
|      | O   | -2.28690500 | -0.51315400 | -0.60309300 |
|      | O   | -2.44141800 | 0.79965700  | -0.63238400 |
|      | C2B | C           | 1.46284100  | 1.67165300  |
| H    |     | 2.54764800  | 1.69399400  | 0.07956500  |
| H    |     | 1.00090600  | 2.47959200  | 0.47482700  |
| H    |     | 1.30811400  | 1.83292200  | -1.16755200 |
| C    |     | 0.93005400  | 0.35036900  | 0.33521000  |
| C    |     | 1.26091900  | -0.80655900 | -0.52739700 |
| H    |     | 1.66832100  | -0.60005200 | -1.51954300 |
| C    |     | 1.07754200  | -2.04111300 | -0.10310600 |
| H    |     | 0.67993900  | -2.21934000 | 0.89865200  |
| H    |     | 1.31545300  | -2.91146800 | -0.71316000 |
| O    |     | 0.33843100  | 0.20240300  | 1.37043400  |
| C    |     | -2.06897100 | -0.10385700 | 0.65994600  |
| H    |     | -1.90250600 | 0.86163300  | 1.14422300  |
| H    |     | -2.54538100 | -0.96797600 | 1.12916400  |
| O    |     | -1.73614800 | -0.26912000 | -0.51400000 |
| O    |     | -1.10813200 | 0.74268500  | -1.09841600 |

|                     |             |             |             |             |
|---------------------|-------------|-------------|-------------|-------------|
| TS2B                | C           | -1.16497500 | -1.80810900 | 0.00084600  |
|                     | H           | -1.41878000 | -1.94042100 | -1.05480000 |
|                     | H           | -2.07414800 | -1.99430300 | 0.58923100  |
|                     | H           | -0.41505200 | -2.54583400 | 0.29652200  |
|                     | C           | -0.67620500 | -0.43500500 | 0.28755000  |
|                     | C           | -1.31396200 | 0.68477700  | -0.41838000 |
|                     | H           | -1.83830500 | 0.45686200  | -1.34843500 |
|                     | C           | -1.24805800 | 1.91508200  | 0.05269200  |
|                     | H           | -0.72962300 | 2.11555400  | 0.99209800  |
|                     | H           | -1.70460000 | 2.76018000  | -0.46017600 |
|                     | O           | 0.02780400  | -0.21737600 | 1.27579300  |
|                     | C           | 1.84765500  | 0.16465800  | 0.56753900  |
|                     | H           | 2.01401400  | -0.88792900 | 0.80285000  |
|                     | H           | 2.24089300  | 0.97725900  | 1.18770300  |
|                     | O           | 1.51669500  | 0.49421700  | -0.58577900 |
|                     | O           | 0.86285900  | -0.53556400 | -1.18332400 |
| P2                  | C           | -1.39466000 | -1.05856500 | 0.32623500  |
|                     | H           | -1.19824700 | -1.98251100 | -0.25636900 |
|                     | H           | -2.16471100 | -1.23666300 | 1.09367900  |
|                     | O           | -1.83579000 | -0.04819400 | -0.48517000 |
|                     | O           | -0.60792700 | 0.26024000  | -1.10620700 |
|                     | C           | 0.09776100  | 1.74568500  | 0.64492500  |
|                     | H           | 0.63596300  | 1.77152100  | 1.59736800  |
|                     | H           | -0.95883500 | 1.96171700  | 0.83201200  |
|                     | H           | 0.50896100  | 2.52146300  | -0.00933900 |
|                     | C           | 0.22685100  | 0.38872000  | 0.01272000  |
|                     | C           | 1.61071900  | 0.09851600  | -0.46098400 |
|                     | H           | 1.99607900  | 0.79293700  | -1.21212700 |
|                     | C           | 2.34767300  | -0.88548300 | -0.00097000 |
|                     | H           | 1.96593300  | -1.56724100 | 0.75904400  |
|                     | H           | 3.36319900  | -1.05084400 | -0.35785000 |
| O                   | -0.24108300 | -0.57999900 | 0.89413100  |             |
| CH <sub>3</sub> CHO | C           | 1.14902700  | -0.14648900 | -0.00003300 |
|                     | H           | 1.69120700  | 0.23578400  | -0.87446400 |
|                     | H           | 1.16224600  | -1.23944900 | -0.00059500 |
|                     | H           | 1.69054100  | 0.23473800  | 0.87529900  |
|                     | C           | -0.23609700 | 0.38453100  | 0.00001700  |
|                     | H           | -0.29236900 | 1.51308100  | -0.00007100 |
|                     | O           | -1.21615100 | -0.27155000 | -0.00000900 |

|      |   |             |             |             |
|------|---|-------------|-------------|-------------|
| C3A  | C | -1.53173700 | 1.18918600  | 0.00854700  |
|      | H | -1.81484100 | 1.69510200  | -0.92452700 |
|      | H | -0.45213500 | 1.28960000  | 0.17385300  |
|      | H | -2.09186700 | 1.71003400  | 0.79656800  |
|      | C | -1.98300000 | -0.21458100 | -0.05595300 |
|      | H | -3.09459900 | -0.33843000 | -0.20145300 |
|      | O | -1.29078700 | -1.17327200 | 0.02898300  |
|      | C | 1.37240500  | -1.04347100 | 0.20943300  |
|      | H | 1.35952100  | -1.98762100 | -0.33691200 |
|      | H | 1.07498800  | -0.92510500 | 1.25538200  |
|      | O | 1.76116000  | -0.06576900 | -0.42924200 |
|      | O | 1.76374300  | 1.11024400  | 0.18337500  |
| TS3A | C | 1.66427000  | -0.83747600 | 0.40154800  |
|      | O | 1.74392000  | 0.07230000  | -0.42368000 |
|      | O | 1.33791400  | 1.27449900  | -0.06215100 |
|      | H | 1.28050600  | -0.62977800 | 1.40432200  |
|      | H | 1.98226900  | -1.81856800 | 0.04561300  |
|      | O | -0.99059600 | -1.24038400 | -0.00719600 |
|      | C | -1.79853400 | -0.41425000 | -0.26811600 |
|      | C | -1.82860400 | 0.96449100  | 0.25987700  |
|      | H | -0.98972700 | 1.16471400  | 0.93087900  |
|      | H | -1.79046200 | 1.67143600  | -0.57873000 |
|      | H | -2.79137200 | 1.14069200  | 0.75806100  |
|      | H | -2.64390300 | -0.65641200 | -0.97578200 |
| C3B  | C | 2.04561900  | 0.46049000  | -0.44857100 |
|      | H | 1.87111800  | 1.53733200  | -0.36243500 |
|      | H | 1.89192400  | 0.13132700  | -1.48044200 |
|      | H | 3.09525100  | 0.28272400  | -0.17475500 |
|      | C | 1.17912000  | -0.28814800 | 0.49247200  |
|      | H | 1.17299200  | 0.11812900  | 1.53921300  |
|      | O | 0.60112100  | -1.29638000 | 0.22674300  |
|      | C | -1.69195000 | -0.57216200 | -0.53630900 |
|      | H | -2.44145500 | -1.33974200 | -0.33214800 |
|      | H | -1.03651300 | -0.55513500 | -1.41073900 |
|      | O | -1.62990000 | 0.33008300  | 0.29955200  |
|      | O | -0.68997800 | 1.24433300  | 0.12067300  |

|                                     |            |             |             |             |
|-------------------------------------|------------|-------------|-------------|-------------|
| TS3B                                | C          | -1.90430800 | 0.28877300  | 0.49377100  |
|                                     | H          | -1.57064400 | 0.03090900  | 1.50442400  |
|                                     | H          | -2.87914700 | -0.19290300 | 0.33168200  |
|                                     | H          | -2.04836500 | 1.37040000  | 0.41839300  |
|                                     | C          | -0.95608100 | -0.21037800 | -0.53186600 |
|                                     | H          | -1.10172900 | 0.20848500  | -1.55427200 |
|                                     | O          | -0.29419600 | -1.22508900 | -0.39334500 |
|                                     | C          | 1.38342800  | -0.53753800 | 0.61302900  |
|                                     | H          | 2.10916100  | -1.35149200 | 0.53279400  |
|                                     | H          | 0.72301400  | -0.41170300 | 1.47254600  |
|                                     | O          | 1.52429100  | 0.38535000  | -0.20518300 |
| O                                   | 0.47358900 | 1.22738500  | -0.17086800 |             |
| P3                                  | C          | -2.01113100 | -0.06959400 | 0.18753900  |
|                                     | H          | -2.59392600 | 0.83185900  | -0.02320400 |
|                                     | H          | -1.94543400 | -0.21445200 | 1.27033300  |
|                                     | H          | -2.53457500 | -0.92389600 | -0.24992000 |
|                                     | C          | -0.65021700 | 0.03606300  | -0.40153600 |
|                                     | H          | -0.67998200 | 0.19924200  | -1.50190500 |
|                                     | O          | 0.11802100  | -1.08573900 | -0.12870000 |
|                                     | C          | 1.34764300  | -0.59190200 | 0.23664800  |
|                                     | H          | 2.16899800  | -1.09334700 | -0.30343500 |
|                                     | H          | 1.49009900  | -0.69160100 | 1.33276900  |
|                                     | O          | 1.34835700  | 0.72174100  | -0.15921100 |
| O                                   | 0.03075300 | 1.06959700  | 0.20534300  |             |
| syn-CH <sub>3</sub> CHOO            | C          | 0.45815900  | 0.69934600  | 0.00032200  |
|                                     | H          | 0.77797700  | 1.74489400  | 0.00008400  |
|                                     | O          | -0.77857300 | 0.56794400  | -0.00022300 |
|                                     | O          | -1.22463600 | -0.67673500 | 0.00011200  |
|                                     | C          | 1.32713700  | -0.45305400 | -0.00009900 |
|                                     | H          | 2.38228600  | -0.17762800 | -0.00149800 |
|                                     | H          | 1.07802200  | -1.08697400 | 0.86432900  |
|                                     | H          | 1.07562300  | -1.08771300 | -0.86336100 |
| CH <sub>3</sub> C(O)CH <sub>3</sub> | C          | 0.00000000  | 0.00000000  | 0.19339800  |
|                                     | O          | 0.00000000  | 0.00000000  | 1.38038500  |
|                                     | C          | 0.00000000  | -1.26621400 | -0.60456100 |
|                                     | H          | -0.93047700 | -1.34735100 | -1.18100200 |
|                                     | H          | 0.81188500  | -1.26787300 | -1.34214600 |
|                                     | H          | 0.09240500  | -2.13645700 | 0.04878000  |
|                                     | C          | 0.00000000  | 1.26621400  | -0.60456100 |
|                                     | H          | 0.93047700  | 1.34735100  | -1.18100200 |
|                                     | H          | -0.81188500 | 1.26787300  | -1.34214600 |
|                                     | H          | -0.09240500 | 2.13645700  | 0.04878000  |

|      |   |             |             |             |
|------|---|-------------|-------------|-------------|
| C4A  | C | 1.73433900  | -0.66819000 | -0.56130900 |
|      | H | 1.50911500  | -1.24608200 | -1.46187100 |
|      | O | 1.82023600  | 0.55045600  | -0.77281500 |
|      | O | 2.06832700  | 1.30593600  | 0.30347500  |
|      | C | 1.93659400  | -1.22377000 | 0.75582000  |
|      | H | 1.82222100  | -2.30817200 | 0.76414500  |
|      | H | 2.92763200  | -0.91690700 | 1.12122500  |
|      | H | 1.23093400  | -0.74719200 | 1.44952500  |
|      | C | -1.76923600 | -0.08377400 | -0.00682800 |
|      | O | -1.00419200 | -0.97351800 | -0.22037400 |
|      | C | -3.24717700 | -0.30485200 | -0.03225600 |
|      | H | -3.64297800 | -0.22899100 | 0.98896800  |
|      | H | -3.75775400 | 0.47476600  | -0.61001400 |
|      | H | -3.49058300 | -1.29145600 | -0.43271300 |
|      | C | -1.32218900 | 1.30666700  | 0.29150600  |
|      | H | -1.44497600 | 1.91258400  | -0.61707200 |
|      | H | -1.95523300 | 1.77841500  | 1.05206300  |
|      | H | -0.26732600 | 1.35356900  | 0.58185700  |
| TS4A | C | -1.88023900 | -0.71569900 | 0.43972700  |
|      | H | -1.83013400 | -1.61649500 | 1.05817000  |
|      | O | -1.52564900 | 0.30638000  | 1.04610600  |
|      | O | -1.53488700 | 1.43361900  | 0.33560100  |
|      | C | -2.29812400 | -0.67088800 | -0.94054900 |
|      | H | -2.62089600 | -1.64747100 | -1.30323700 |
|      | H | -3.08700800 | 0.08687300  | -1.05110100 |
|      | H | -1.45846500 | -0.29055200 | -1.53977200 |
|      | C | 1.69302400  | -0.19418200 | -0.18600400 |
|      | O | 0.85165300  | -1.02452500 | -0.33685400 |
|      | C | 2.92668000  | -0.46383500 | 0.61349400  |
|      | H | 3.82656900  | -0.12280900 | 0.08773100  |
|      | H | 2.88564600  | 0.11503500  | 1.54545900  |
|      | H | 3.01335800  | -1.52466500 | 0.85920100  |
|      | C | 1.59021000  | 1.16748700  | -0.78684600 |
|      | H | 1.97916900  | 1.93942700  | -0.11369600 |
|      | H | 2.21741600  | 1.19972700  | -1.68863200 |
|      | H | 0.55610700  | 1.39984100  | -1.05188000 |

|      |             |             |             |             |
|------|-------------|-------------|-------------|-------------|
| C4B  | C           | 1.93628200  | 0.32114900  | -0.50680300 |
|      | H           | 2.32117700  | 0.78672800  | -1.41949000 |
|      | O           | 1.24141600  | 1.09501600  | 0.16891100  |
|      | O           | 0.71720000  | 0.57436500  | 1.28109900  |
|      | C           | 2.19750900  | -1.03366300 | -0.08594500 |
|      | H           | 2.88788900  | -1.54485900 | -0.75779500 |
|      | H           | 2.56951700  | -1.01659200 | 0.94843700  |
|      | H           | 1.23829700  | -1.56905800 | -0.03199300 |
|      | C           | -1.42729900 | -0.24280200 | -0.34442900 |
|      | O           | -0.71975200 | -0.66075100 | -1.20970500 |
|      | C           | -1.96331200 | 1.15020700  | -0.36180600 |
|      | H           | -3.04498700 | 1.16380300  | -0.18082600 |
|      | H           | -1.49927100 | 1.71223200  | 0.45831900  |
|      | H           | -1.73986500 | 1.64203900  | -1.31156700 |
|      | C           | -1.85791300 | -1.08671400 | 0.80984300  |
|      | H           | -1.74337300 | -0.54402600 | 1.75407500  |
|      | H           | -2.92428300 | -1.33014200 | 0.70743200  |
| H    | -1.28761600 | -2.01822900 | 0.84581300  |             |
| TS4B | C           | -1.58095600 | -0.42923900 | -0.36922100 |
|      | H           | -2.05103800 | -0.99841800 | -1.18374900 |
|      | O           | -0.93110500 | -1.18410800 | 0.39357500  |
|      | O           | -0.11199900 | -0.47299600 | 1.21344100  |
|      | C           | -2.07911900 | 0.89740700  | -0.03171400 |
|      | H           | -2.11431400 | 1.52305400  | -0.92511600 |
|      | H           | -3.11097300 | 0.77711900  | 0.33567900  |
|      | H           | -1.46710700 | 1.36336500  | 0.73844900  |
|      | C           | 1.00022200  | 0.20558800  | -0.28229400 |
|      | O           | 0.14567300  | 0.36247400  | -1.15946500 |
|      | C           | 1.90470800  | -0.98240600 | -0.35163700 |
|      | H           | 2.45132100  | -1.15500400 | 0.57937200  |
|      | H           | 1.33061600  | -1.87752000 | -0.60820200 |
|      | H           | 2.63354100  | -0.81928000 | -1.15808000 |
|      | C           | 1.51182800  | 1.38513400  | 0.47934100  |
|      | H           | 0.73595500  | 2.15009200  | 0.57257200  |
|      | H           | 1.87744700  | 1.10691800  | 1.47260800  |
| H    | 2.35390600  | 1.82780600  | -0.07078800 |             |

|                           |             |             |             |             |
|---------------------------|-------------|-------------|-------------|-------------|
| P4                        | C           | -1.26055200 | -0.35112600 | -0.44786500 |
|                           | H           | -1.67295000 | -1.08887200 | -1.16433200 |
|                           | O           | -0.78493200 | -1.10415200 | 0.61239200  |
|                           | O           | 0.17322400  | -0.21133400 | 1.13516000  |
|                           | C           | -2.28386700 | 0.66180100  | -0.04252900 |
|                           | H           | -2.55801900 | 1.28617200  | -0.89867400 |
|                           | H           | -3.18744800 | 0.17164900  | 0.33457100  |
|                           | H           | -1.87712400 | 1.30861300  | 0.74186400  |
|                           | C           | 0.86807700  | 0.11501500  | -0.02507800 |
|                           | O           | -0.13970900 | 0.25410600  | -0.97802000 |
|                           | C           | 1.81513400  | -0.97791600 | -0.43429800 |
|                           | H           | 2.24943300  | -0.75589700 | -1.41414500 |
|                           | H           | 2.62794600  | -1.08303900 | 0.29203700  |
|                           | H           | 1.27991200  | -1.92926400 | -0.50266300 |
|                           | C           | 1.53398800  | 1.43259500  | 0.22055400  |
|                           | H           | 2.28358500  | 1.34817400  | 1.01339700  |
|                           | H           | 2.03813100  | 1.76843900  | -0.69007100 |
| H                         | 0.79118400  | 2.18285600  | 0.50705800  |             |
| anti-CH <sub>3</sub> CHOO | C           | -0.36746200 | 0.41182100  | 0.00011900  |
|                           | H           | -0.10045400 | 1.47717200  | -0.00026000 |
|                           | O           | 0.56919400  | -0.39832700 | 0.00001600  |
|                           | O           | 1.80361500  | 0.06491800  | -0.00003400 |
|                           | C           | -1.72932600 | -0.10122300 | -0.00001000 |
|                           | H           | -2.28348600 | 0.26140300  | 0.87634900  |
|                           | H           | -2.28275000 | 0.25925700  | -0.87773900 |
|                           | H           | -1.73504900 | -1.19414900 | 0.00114500  |
| C5A                       | C           | 1.75409200  | -0.12578900 | -0.05774400 |
|                           | O           | 0.86461700  | -0.90461500 | -0.22336000 |
|                           | C           | 1.55316200  | 1.34764700  | -0.12056300 |
|                           | H           | 2.10989900  | 1.85724200  | 0.67494900  |
|                           | H           | 1.98211100  | 1.71616100  | -1.06298800 |
|                           | H           | 0.49222000  | 1.62167400  | -0.08474400 |
|                           | C           | 3.14671500  | -0.59024900 | 0.22285900  |
|                           | H           | 3.87944800  | -0.05072700 | -0.38846600 |
|                           | H           | 3.39965400  | -0.36173600 | 1.26644900  |
|                           | H           | 3.24252500  | -1.66688400 | 0.06533000  |
|                           | C           | -1.80807600 | -0.35729300 | -0.35761000 |
|                           | H           | -1.46428200 | -0.09831300 | -1.36720800 |
|                           | O           | -1.97601700 | 0.57381500  | 0.43486800  |
|                           | O           | -1.70398100 | 1.81205300  | 0.00246700  |
|                           | C           | -2.08823100 | -1.71417400 | 0.08436300  |
|                           | H           | -2.86311000 | -2.17234100 | -0.54437600 |
|                           | H           | -1.18548300 | -2.32763700 | -0.02534500 |
| H                         | -2.41589700 | -1.72831400 | 1.12676800  |             |



|      |     |             |             |             |            |
|------|-----|-------------|-------------|-------------|------------|
| TS5A | C   | 1.69784100  | -0.21089300 | -0.11963200 |            |
|      | O   | 0.81222800  | -0.99501900 | -0.28315400 |            |
|      | C   | 1.61062400  | 1.18633500  | -0.63335500 |            |
|      | H   | 2.44288100  | 1.81925500  | -0.31161900 |            |
|      | H   | 1.60839900  | 1.15488100  | -1.73023400 |            |
|      | H   | 0.65341100  | 1.63240600  | -0.32728500 |            |
|      | C   | 2.94613900  | -0.58328400 | 0.60611700  |            |
|      | H   | 3.82508600  | -0.38321700 | -0.01968800 |            |
|      | H   | 3.06241700  | 0.05530200  | 1.49130100  |            |
|      | H   | 2.93484600  | -1.63258800 | 0.90916800  |            |
|      | C   | -1.81253600 | -0.21879900 | -0.34859800 |            |
|      | H   | -1.51412700 | 0.15310900  | -1.33761600 |            |
|      | O   | -1.81872900 | 0.59437200  | 0.57943900  |            |
|      | O   | -1.44613300 | 1.85187200  | 0.30774800  |            |
|      | C   | -2.19617800 | -1.59471100 | -0.07805900 |            |
|      | H   | -3.03705800 | -1.89485400 | -0.71658000 |            |
|      | H   | -1.35734100 | -2.25968700 | -0.31940000 |            |
|      | H   | -2.47278000 | -1.72629600 | 0.97085900  |            |
|      | C5B | C           | -1.29384200 | 0.49010000  | 0.06680600 |
|      |     | O           | -0.36600600 | 1.25177200  | 0.07468900 |
| C    |     | -2.06731400 | 0.20108300  | -1.17582100 |            |
| H    |     | -2.25223900 | -0.87136800 | -1.28660900 |            |
| H    |     | -3.04832300 | 0.69375300  | -1.11525900 |            |
| H    |     | -1.54303100 | 0.58018200  | -2.05671600 |            |
| C    |     | -1.83740800 | -0.08481800 | 1.33309700  |            |
| H    |     | -2.63738500 | 0.57370300  | 1.70127300  |            |
| H    |     | -2.26587600 | -1.07992000 | 1.18861100  |            |
| H    |     | -1.05718500 | -0.12499300 | 2.09716300  |            |
| C    |     | 1.65904600  | -0.05330700 | -0.41711000 |            |
| H    |     | 1.21864900  | 0.14149500  | -1.40228700 |            |
| O    |     | 1.17600700  | -0.97810900 | 0.24320500  |            |
| O    |     | 0.08525300  | -1.56074400 | -0.27903200 |            |
| C    |     | 2.75854400  | 0.71146200  | 0.14541300  |            |
| H    |     | 3.61555100  | 0.73159500  | -0.53851600 |            |
| H    |     | 2.42843900  | 1.75151700  | 0.27162800  |            |
| H    |     | 3.06522200  | 0.31356300  | 1.11549700  |            |

|      |    |             |             |             |            |
|------|----|-------------|-------------|-------------|------------|
| TS5B | C  | -1.08554300 | 0.36028100  | 0.17459900  |            |
|      | O  | -0.09091900 | 0.99154300  | 0.53063700  |            |
|      | C  | -1.80132700 | 0.72092200  | -1.08477800 |            |
|      | H  | -2.33073500 | -0.13239200 | -1.51907900 |            |
|      | H  | -2.54496700 | 1.49982500  | -0.86218100 |            |
|      | H  | -1.10510200 | 1.12769700  | -1.82418200 |            |
|      | C  | -1.87033200 | -0.39496300 | 1.19527000  |            |
|      | H  | -2.51107100 | 0.31073300  | 1.74332800  |            |
|      | H  | -2.51232000 | -1.15887800 | 0.74847000  |            |
|      | H  | -1.19387000 | -0.86175100 | 1.91589400  |            |
|      | C  | 1.47785000  | 0.04381800  | -0.38894800 |            |
|      | H  | 1.09904500  | 0.50183300  | -1.30779700 |            |
|      | O  | 1.02128700  | -1.07536300 | -0.07375400 |            |
|      | O  | -0.19426400 | -1.26880500 | -0.64716100 |            |
|      | C  | 2.66485600  | 0.52475200  | 0.30307600  |            |
|      | H  | 3.51846000  | 0.58047500  | -0.38293200 |            |
|      | H  | 2.46702800  | 1.53994000  | 0.66242300  |            |
|      | H  | 2.91168000  | -0.11533600 | 1.15297000  |            |
|      | P5 | C           | 0.92208500  | 0.02892600  | 0.08919800 |
|      |    | O           | -0.18553500 | -0.20142100 | 0.90374100 |
| C    |    | 2.04897200  | -0.89185700 | 0.43994800  |            |
| H    |    | 2.88167700  | -0.77282500 | -0.26055600 |            |
| H    |    | 2.41562500  | -0.66540700 | 1.44537900  |            |
| H    |    | 1.70891700  | -1.93117200 | 0.41496700  |            |
| C    |    | 1.28405300  | 1.48560800  | 0.14560700  |            |
| H    |    | 1.48111700  | 1.78965900  | 1.17863700  |            |
| H    |    | 2.17584200  | 1.69228600  | -0.45562800 |            |
| H    |    | 0.45293600  | 2.08595900  | -0.23671100 |            |
| C    |    | -1.23538000 | -0.46679700 | 0.05064500  |            |
| H    |    | -1.34263600 | -1.56764700 | -0.08205100 |            |
| O    |    | -0.85186500 | 0.10229000  | -1.14430400 |            |
| O    |    | 0.48098300  | -0.34185700 | -1.18331700 |            |
| C    |    | -2.49789900 | 0.16554300  | 0.51785800  |            |
| H    |    | -3.31365400 | -0.03561600 | -0.18265300 |            |
| H    |    | -2.77620400 | -0.24335100 | 1.49275300  |            |
| H    |    | -2.36326900 | 1.24748300  | 0.61737500  |            |

**Table S11.** Absolute energies in hartrees.

| Species                             | Method                             | Total energy (a.u.) |
|-------------------------------------|------------------------------------|---------------------|
| CH <sub>2</sub> OO                  | W3X-L//DF-CCSD(T)-F12b/jun-cc-pVDZ | -189.7223494        |
|                                     | W2X//DF-CCSD(T)-F12b/jun-cc-pVDZ   | -189.7193694        |
|                                     | CCSD(T)-F12a/VTZ-F12//B3LYP/MG3S   | -189.4053176        |
|                                     | CBS-QB3                            | -189.373842         |
|                                     | WMS//DF-CCSD(T)-F12b/jun-cc-pVDZ   | -189.6822427        |
|                                     | WMS//M11-L/MG3S                    | -189.6814116        |
|                                     | M11-L/MG3S                         | -189.5829489        |
|                                     | M06CR/MG3S                         | -189.4727729        |
|                                     | MN15-L/MG3S                        | -189.4750307        |
|                                     | M06-2X/MG3S                        | -189.5654488        |
| CH <sub>3</sub> C(O)CH <sub>3</sub> | W3X-L//DF-CCSD(T)-F12b/jun-cc-pVDZ | -193.2720245        |
|                                     | W2X//DF-CCSD(T)-F12b/jun-cc-pVDZ   | -193.2704814        |
|                                     | CCSD(T)-F12a/VTZ-F12//B3LYP/MG3S   | -192.9275326        |
|                                     | CBS-QB3                            | -192.901923         |
|                                     | WMS//DF-CCSD(T)-F12b/jun-cc-pVDZ   | -193.2298872        |
|                                     | WMS//M11-L/MG3S                    | -193.2289445        |
|                                     | M11-L/MG3S                         | -193.1751747        |
|                                     | M06CR/MG3S                         | -193.0129886        |
|                                     | MN15-L/MG3S                        | -193.0315698        |
|                                     | M06-2X/MG3S                        | -193.1308427        |
| CA                                  | W3X-L//DF-CCSD(T)-F12b/jun-cc-pVDZ | -383.0053883        |
|                                     | W2X//DF-CCSD(T)-F12b/jun-cc-pVDZ   | -383.0010702        |
|                                     | CCSD(T)-F12a/VTZ-F12//B3LYP/MG3S   | -382.3442834        |
|                                     | CBS-QB3                            | -382.287675         |
|                                     | WMS//DF-CCSD(T)-F12b/jun-cc-pVDZ   | -382.9227426        |
|                                     | WMS//M11-L/MG3S                    | -382.9198481        |
|                                     | M11-L/MG3S                         | -382.7681605        |
|                                     | M06CR/MG3S                         | -382.4971124        |
|                                     | MN15-L/MG3S                        | -382.5198569        |
|                                     | M06-2X/MG3S                        | -382.7106115        |
| TSA                                 | W3X-L//DF-CCSD(T)-F12b/jun-cc-pVDZ | -383.0044937        |
|                                     | W2X//DF-CCSD(T)-F12b/jun-cc-pVDZ   | -383.0001513        |
|                                     | CCSD(T)-F12a/VTZ-F12//B3LYP/MG3S   | -382.3432226        |
|                                     | CBS-QB3                            | -382.287067         |
|                                     | WMS//DF-CCSD(T)-F12b/jun-cc-pVDZ   | -382.9219745        |
|                                     | WMS//M11-L/MG3S                    | -382.9189373        |
|                                     | M11-L/MG3S                         | -382.767225         |
|                                     | M06CR/MG3S                         | -382.4963547        |
|                                     | MN15-L/MG3S                        | -382.5189631        |
|                                     | M06-2X/MG3S                        | -382.7093169        |

|                                       |                                    |              |
|---------------------------------------|------------------------------------|--------------|
| CB                                    | W3X-L//DF-CCSD(T)-F12b/jun-cc-pVDZ | -383.0082139 |
|                                       | W2X//DF-CCSD(T)-F12b/jun-cc-pVDZ   | -383.0040193 |
|                                       | CCSD(T)-F12a/VTZ-F12//B3LYP/MG3S   | -382.3465565 |
|                                       | CBS-QB3                            | -382.29094   |
|                                       | WMS//DF-CCSD(T)-F12b/jun-cc-pVDZ   | -382.9256983 |
|                                       | WMS//M11-L/MG3S                    | -382.9226958 |
|                                       | M11-L/MG3S                         | -382.7709323 |
|                                       | M06CR/MG3S                         | -382.4999604 |
|                                       | MN15-L/MG3S                        | -382.5241368 |
|                                       | M06-2X/MG3S                        | -382.7146208 |
| TSB                                   | W3X-L//DF-CCSD(T)-F12b/jun-cc-pVDZ | -383.0044879 |
|                                       | W2X//DF-CCSD(T)-F12b/jun-cc-pVDZ   | -383.0007207 |
|                                       | CCSD(T)-F12a/VTZ-F12//B3LYP/MG3S   | -382.3437838 |
|                                       | CBS-QB3                            | -382.288718  |
|                                       | WMS//DF-CCSD(T)-F12b/jun-cc-pVDZ   | -382.9222644 |
|                                       | WMS//M11-L/MG3S                    | -382.9197814 |
|                                       | M11-L/MG3S                         | -382.7670134 |
|                                       | M06CR/MG3S                         | -382.492531  |
|                                       | MN15-L/MG3S                        | -382.5196257 |
|                                       | M06-2X/MG3S                        | -382.7101004 |
| P                                     | W3X-L//DF-CCSD(T)-F12b/jun-cc-pVDZ | -383.0784613 |
|                                       | W2X//DF-CCSD(T)-F12b/jun-cc-pVDZ   | -383.0761346 |
|                                       | CCSD(T)-F12a/VTZ-F12//B3LYP/MG3S   | -382.4190382 |
|                                       | CBS-QB3                            | -382.36424   |
|                                       | WMS//DF-CCSD(T)-F12b/jun-cc-pVDZ   | -382.9969636 |
|                                       | WMS//M11-L/MG3S                    | -382.9923594 |
|                                       | M11-L/MG3S                         | -382.839762  |
|                                       | M06CR/MG3S                         | -382.5646216 |
|                                       | MN15-L/MG3S                        | -382.590982  |
|                                       | M06-2X/MG3S                        | -382.7916825 |
| CH <sub>3</sub> C(O)CHCH <sub>2</sub> | WMS//M11-L/MG3S                    | -231.3183369 |
|                                       | M11-L/MG3S                         | -231.2567216 |
| C2A                                   | WMS//M11-L/MG3S                    | -421.0092832 |
|                                       | M11-L/MG3S                         | -420.8494615 |
| TS2A                                  | WMS//M11-L/MG3S                    | -421.008087  |
|                                       | M11-L/MG3S                         | -420.8483841 |
| C2B                                   | WMS//M11-L/MG3S                    | -421.0119029 |
|                                       | M11-L/MG3S                         | -420.8529254 |
| TS2B                                  | WMS//M11-L/MG3S                    | -421.0099662 |
|                                       | M11-L/MG3S                         | -420.8488404 |
| P2                                    | WMS//M11-L/MG3S                    | -421.0772766 |
|                                       | M11-L/MG3S                         | -420.9160801 |
| CH <sub>3</sub> CHO                   | WMS//M11-L/MG3S                    | -153.8937342 |

|                           |                 |              |
|---------------------------|-----------------|--------------|
|                           | M11-L/MG3S      | -153.8442977 |
| C3A                       | WMS//M11-L/MG3S | -343.5843274 |
|                           | M11-L/MG3S      | -343.4368809 |
| TS3A                      | WMS//M11-L/MG3S | -343.5831945 |
|                           | M11-L/MG3S      | -343.4358659 |
| C3B                       | WMS//M11-L/MG3S | -343.5872752 |
|                           | M11-L/MG3S      | -343.440046  |
| TS3B                      | WMS//M11-L/MG3S | -343.5861225 |
|                           | M11-L/MG3S      | -343.4372129 |
| P3                        | WMS//M11-L/MG3S | -343.6600355 |
|                           | M11-L/MG3S      | -343.512028  |
| syn-CH <sub>3</sub> CHOO  | WMS//M11-L/MG3S | -229.020728  |
|                           | M11-L/MG3S      | -228.9231196 |
| C4A                       | WMS//M11-L/MG3S | -422.2604436 |
|                           | M11-L/MG3S      | -422.1076859 |
| TS4A                      | WMS//M11-L/MG3S | -422.2595716 |
|                           | M11-L/MG3S      | -422.1068489 |
| C4B                       | WMS//M11-L/MG3S | -422.2632573 |
|                           | M11-L/MG3S      | -422.1107387 |
| TS4B                      | WMS//M11-L/MG3S | -422.2541486 |
|                           | M11-L/MG3S      | -422.0989088 |
| P4                        | WMS//M11-L/MG3S | -422.3253557 |
|                           | M11-L/MG3S      | -422.1684496 |
| anti-CH <sub>3</sub> CHOO | WMS//M11-L/MG3S | -229.0147786 |
|                           | M11-L/MG3S      | -228.9170142 |
| C5A                       | WMS//M11-L/MG3S | -422.2571467 |
|                           | M11-L/MG3S      | -422.1036766 |
| TS5A                      | WMS//M11-L/MG3S | -422.2566387 |
|                           | M11-L/MG3S      | -422.1033779 |
| C5B                       | WMS//M11-L/MG3S | -422.2604523 |
|                           | M11-L/MG3S      | -422.1075843 |
| TS5B                      | WMS//M11-L/MG3S | -422.2590748 |
|                           | M11-L/MG3S      | -422.1039683 |
| P5                        | WMS//M11-L/MG3S | -422.326879  |
|                           | M11-L/MG3S      | -422.1701946 |

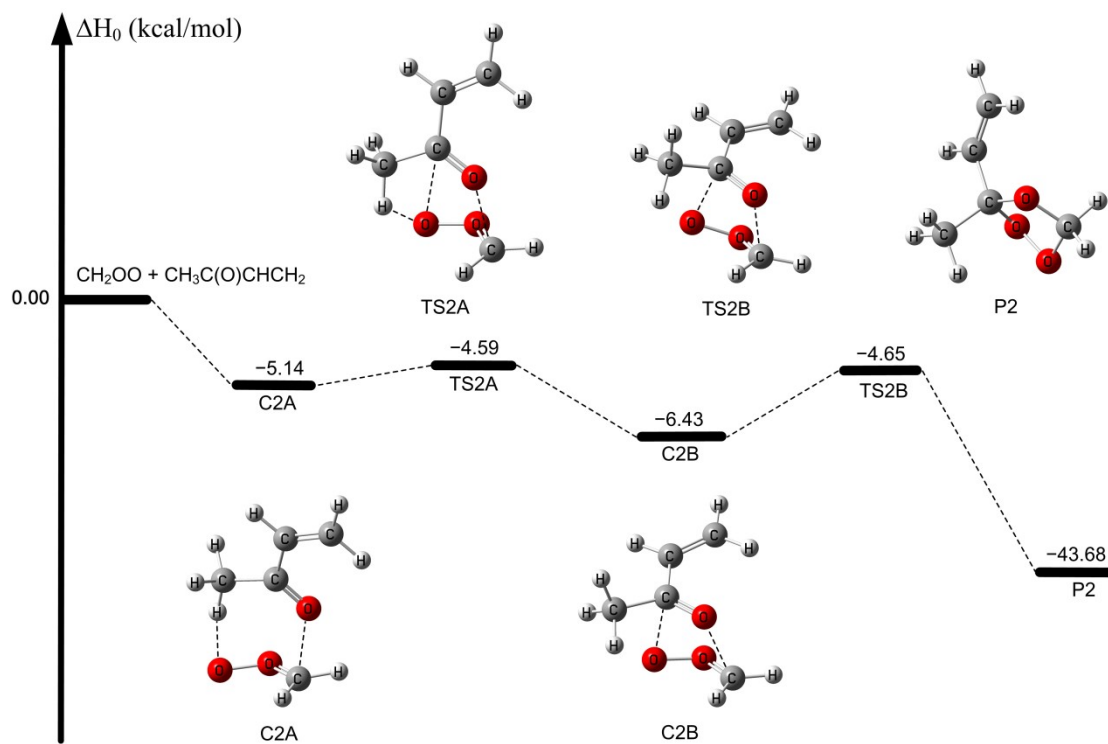

**Figure S1.** The calculated enthalpy profile for the  $\text{CH}_2\text{OO} + \text{CH}_3\text{C}(\text{O})\text{CHCH}_2$  reaction by WMS//M11-L/MG3S at 0 K.

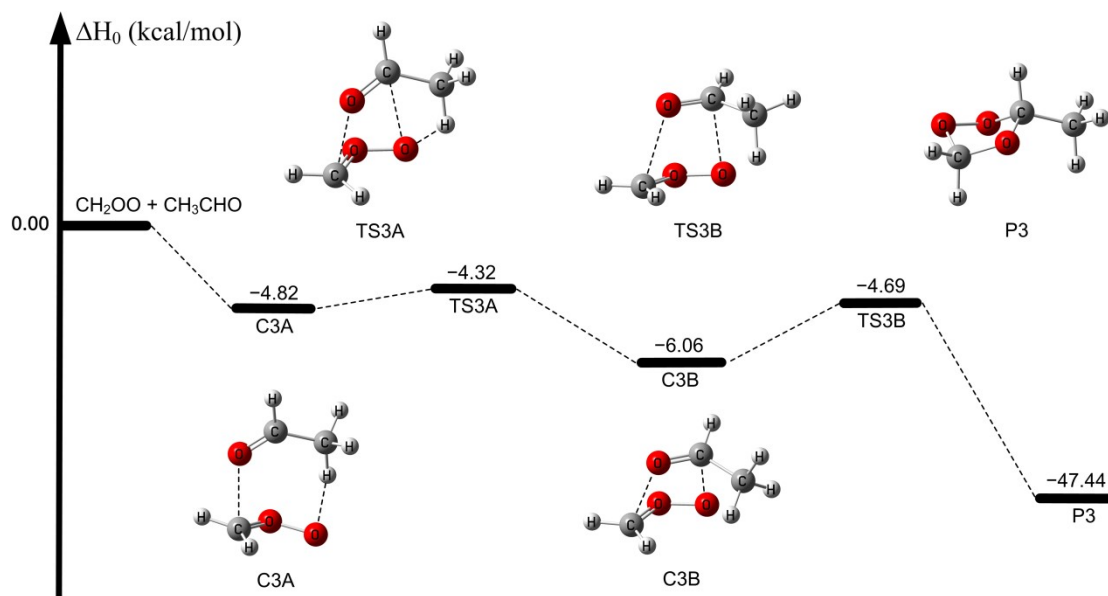

**Figure S2.** The calculated enthalpy profile for the CH<sub>2</sub>OO + CH<sub>3</sub>CHO reaction by WMS//M11-L/MG3S at 0 K.

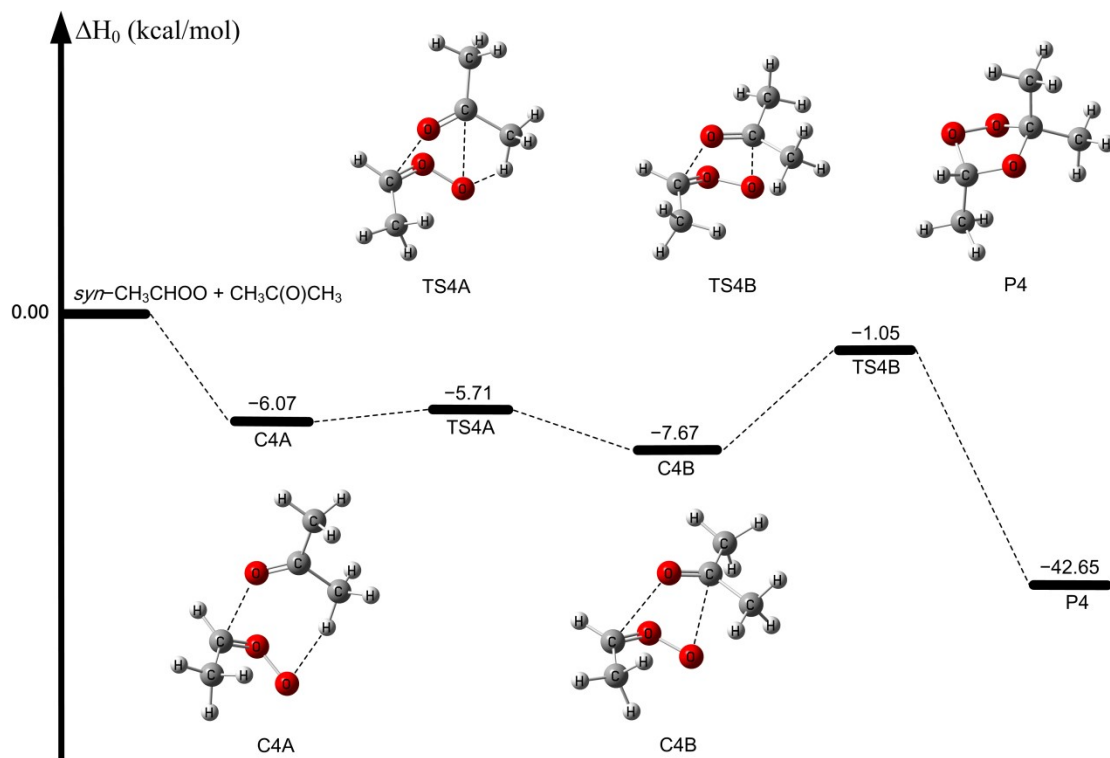

**Figure S3.** The calculated enthalpy profile for the *syn*-CH<sub>3</sub>CHOO + CH<sub>3</sub>C(O)CH<sub>3</sub> reaction by WMS//M11-L/MG3S at 0 K.



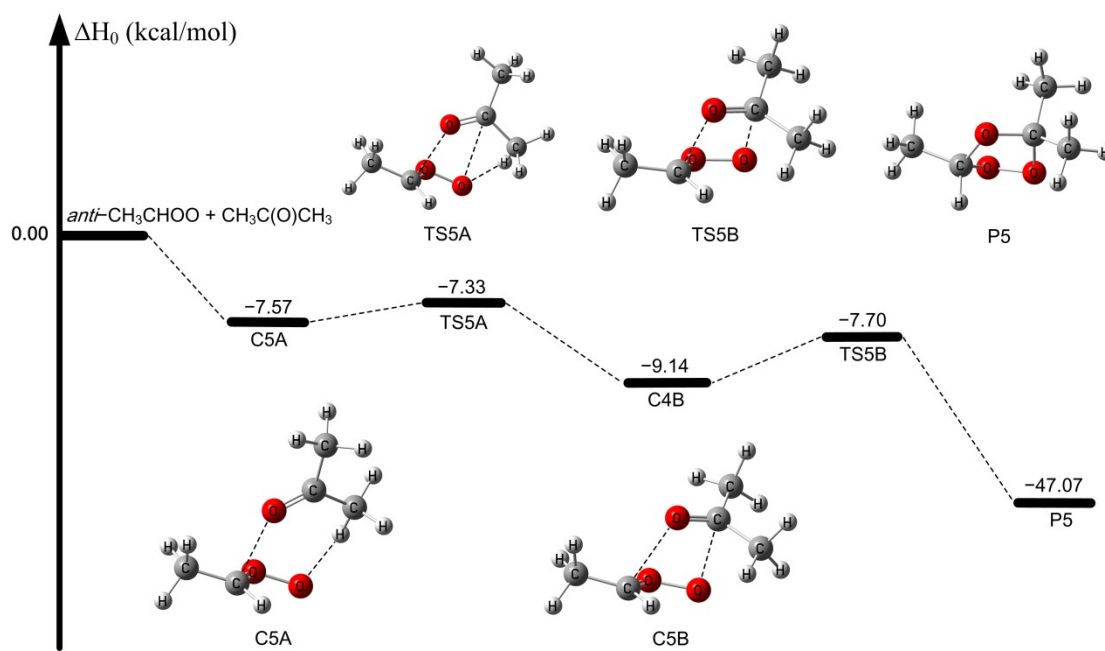

**Figure S4.** The calculated enthalpy profile for the *anti*-CH<sub>3</sub>CHOO + CH<sub>3</sub>C(O)CH<sub>3</sub> reaction by WMS//M11-L/MG3S at 0 K.
